# Supplementary material for: Functional tests of the competitive exclusion hypothesis for multituberculate extinction
Source: PubMed Central journal article supplement (PMC6458384; doi:10.1098/rsos.181536), 2019-03-27
Supplement: rsos181536supp1.pdf [file rsos181536supp1.pdf]

|    |                                                                                      |           |
|----|--------------------------------------------------------------------------------------|-----------|
| 1  | Supplemental material for:                                                           |           |
| 2  | <b>Functional tests of the competitive exclusion hypothesis for multituberculate</b> |           |
| 3  | <b>mammal extinction</b>                                                             |           |
| 4  | Neil F. Adams, Emily J. Rayfield, Philip G. Cox, Samuel N. Cobb, Ian J. Corfe        |           |
| 5  |                                                                                      |           |
| 6  | <b>Contents</b>                                                                      |           |
| 7  | <b>1. Supplementary material and methods</b>                                         | <b>2</b>  |
| 8  | (a) Calculating masticatory muscle forces                                            | 2         |
| 9  | (b) Finite element analysis                                                          | 7         |
| 10 | (i) FE meshes and material properties                                                | 7         |
| 11 | (ii) Model constraints                                                               | 9         |
| 12 | (iii) Input muscle forces and scaling of DigiMorph specimens                         | 10        |
| 13 | (c) Calculating bite force quotient (BFQ)                                            | 11        |
| 14 | (d) Biomechanical analysis in MomentMacro                                            | 11        |
| 15 | (e) Shapiro-Wilk tests of normality for $Z_x$ , $Z_y$ and $J$ data                   | 20        |
| 16 | <b>2. Supplementary results</b>                                                      | <b>22</b> |
| 17 | (a) Stress distribution supplementary figures                                        | 22        |
| 18 | (b) Cox <i>et al.</i> (2012) cranial stress distribution figures                     | 31        |
| 19 | (c) Average stress data                                                              | 32        |
| 20 | (d) Mechanical efficiency data                                                       | 34        |
| 21 | (e) $Z_x$ , $Z_y$ , $J$ supplementary data                                           | 35        |
| 22 | <b>References</b>                                                                    | <b>36</b> |
| 23 |                                                                                      |           |

24 **1. Supplementary material and methods**

25 **(a) Calculating masticatory muscle forces**

26 Muscle forces have been previously calculated for the squirrel, guinea pig and rat [1]  
27 following the 'dry skull' method of Thomason [2], which uses muscle cross-sectional  
28 area to determine force. To calculate the muscle force for the mouse (Table S1) and  
29 *Kryptobaatar* (Table S2), volumes of each muscle were measured using the Label  
30 Analysis module in Avizo. Approximations of muscle fibre lengths were made using  
31 the Avizo measurement tool. Ten measurements were made for each muscle  
32 between the origin and attachment sites and were then averaged to provide a mean  
33 fibre length. This assumes that muscle fibre length is equal to the length of the entire  
34 muscle, which may not be the case in reality, but this approach follows that used for  
35 extant rodents [1], which showed that similar digital estimates were within 1.5 mm of  
36 *ex vivo* measurements. Physiological cross-sectional areas (PCSAs) were calculated  
37 by dividing the muscle volume by the mean fibre length, and muscle forces were  
38 calculated by multiplying PCSAs by an isometric stress value of 0.3 N/mm<sup>2</sup> [1, 2].

39

40 The 3D volumes of masticatory muscles of extant rodents are known and can be  
41 precisely measured. However, reconstructing 3D muscles for fossil taxa lacking soft  
42 tissues, such as *Kryptobaatar*, is problematic. While identifying muscle origin and  
43 attachment sites was relatively straightforward due to the excellent preservation of  
44 the *Kryptobaatar* skull, the final 'fleshing-out' stage required more inference. For  
45 some muscles, such as the intermediate zygomaticomandibularis and deep  
46 masseter, the final 3D shape was tightly constrained by available space between  
47 bones and surrounding muscles. Other muscles were expanded to fill available  
48 spaces, such as the filling of the temporal fenestra by the temporalis muscles. The

49 most subjectivity was introduced by determining the thickness of outwardly  
 50 unconstrained muscles, such as the superficial masseters and anterior  
 51 zygomaticomandibularis. To minimize uninformed inference, the minimum distance  
 52 required to connect origin and insertion sites was reconstructed. This could lead to  
 53 underestimations of muscle volume and forces if muscles thickened significantly  
 54 between origin and attachment sites. However, this cannot be assessed from  
 55 osteological correlates and would require high levels of speculation.

56

57 **Table S1.** Volumes (from [3]), physiological cross-sectional areas (PCSAs) and  
 58 forces of masticatory muscles for *Mus musculus*.

| <b>Muscle</b>                        | <b>Volume (mm<sup>3</sup>)</b> | <b>% of total muscle volume</b> | <b>Mean fibre length (mm)</b> | <b>PCSA (mm<sup>2</sup>)</b> | <b>Muscle force (N)</b> | <b>% of total muscle force</b> |
|--------------------------------------|--------------------------------|---------------------------------|-------------------------------|------------------------------|-------------------------|--------------------------------|
| Deep masseter                        | 101.89                         | 34.01                           | 5.16                          | 19.73                        | 5.92                    | 28.26                          |
| Superficial masseter                 | 52.83                          | 17.63                           | 6.07                          | 8.70                         | 2.61                    | 12.46                          |
| Temporalis                           | 68.63                          | 22.91                           | 4.88                          | 14.05                        | 4.22                    | 20.13                          |
| External pterygoid                   | 14.49                          | 4.84                            | 1.66                          | 8.72                         | 2.61                    | 12.49                          |
| Internal pterygoid                   | 35.38                          | 11.81                           | 3.43                          | 10.33                        | 3.10                    | 14.80                          |
| Infraorbital zygomatico-mandibularis | 7.17                           | 2.39                            | 4.43                          | 1.62                         | 0.49                    | 2.32                           |
| Anterior zygomatico-mandibularis     | 15.71                          | 5.24                            | 3.25                          | 4.84                         | 1.45                    | 6.93                           |
| Posterior zygomatico-mandibularis    | 3.52                           | 1.17                            | 1.93                          | 1.82                         | 0.55                    | 2.61                           |
| <b>Total</b>                         | <b>299.62</b>                  | <b>100.00</b>                   |                               |                              | <b>20.94</b>            | <b>100.00</b>                  |

59

60 **Table S2.** Volumes, physiological cross-sectional areas (PCSAs) and forces of  
 61 masticatory muscles for *Kryptobaatar dashzevegi*.

| <b>Muscle</b>                        | <b>Volume (mm<sup>3</sup>)</b> | <b>% of total muscle volume</b> | <b>Mean fibre length (mm)</b> | <b>PCSA (mm<sup>2</sup>)</b> | <b>Muscle force (N)</b> | <b>% of total muscle force</b> |
|--------------------------------------|--------------------------------|---------------------------------|-------------------------------|------------------------------|-------------------------|--------------------------------|
| Deep masseter                        | 45.87                          | 16.13                           | 6.05                          | 7.58                         | 2.27                    | 17.43                          |
| Anterior superficial masseter        | 24.61                          | 8.65                            | 7.72                          | 3.19                         | 0.96                    | 7.32                           |
| Posterior superficial masseter       | 8.67                           | 3.05                            | 6.27                          | 1.38                         | 0.41                    | 3.18                           |
| Medial temporalis                    | 49.60                          | 17.44                           | 9.70                          | 5.11                         | 1.53                    | 11.75                          |
| Lateral temporalis                   | 71.29                          | 25.07                           | 6.72                          | 10.61                        | 3.18                    | 24.38                          |
| External pterygoid                   | 10.98                          | 3.86                            | 3.65                          | 3.01                         | 0.90                    | 6.92                           |
| Internal pterygoid                   | 25.97                          | 9.13                            | 4.35                          | 5.97                         | 1.79                    | 13.71                          |
| Anterior zygomatico-mandibularis     | 30.01                          | 10.55                           | 8.46                          | 3.55                         | 1.06                    | 8.15                           |
| Intermediate zygomatico-mandibularis | 15.87                          | 5.58                            | 5.85                          | 2.71                         | 0.81                    | 6.23                           |
| Posterior zygomatico-mandibularis    | 1.50                           | 0.53                            | 3.71                          | 0.40                         | 0.12                    | 0.93                           |
| <b>Total</b>                         | <b>284.37</b>                  | <b>100.00</b>                   |                               |                              | <b>13.06</b>            | <b>100.00</b>                  |

62

63 **Figure S1.** Three-dimensional masticatory muscle reconstructions for *Kryptobaatar*  
64 *dashzevegi* (based on muscle reconstructions by [4]). The anterior and posterior  
65 superficial masseter (a), deep masseter (b), anterior, intermediate and posterior  
66 zygomaticomandibularis (c), and anterior and posterior temporalis (d) are shown in  
67 left lateral view. The internal and external pterygoids (e) are shown in dorsally  
68 oblique, right lateral view.

69

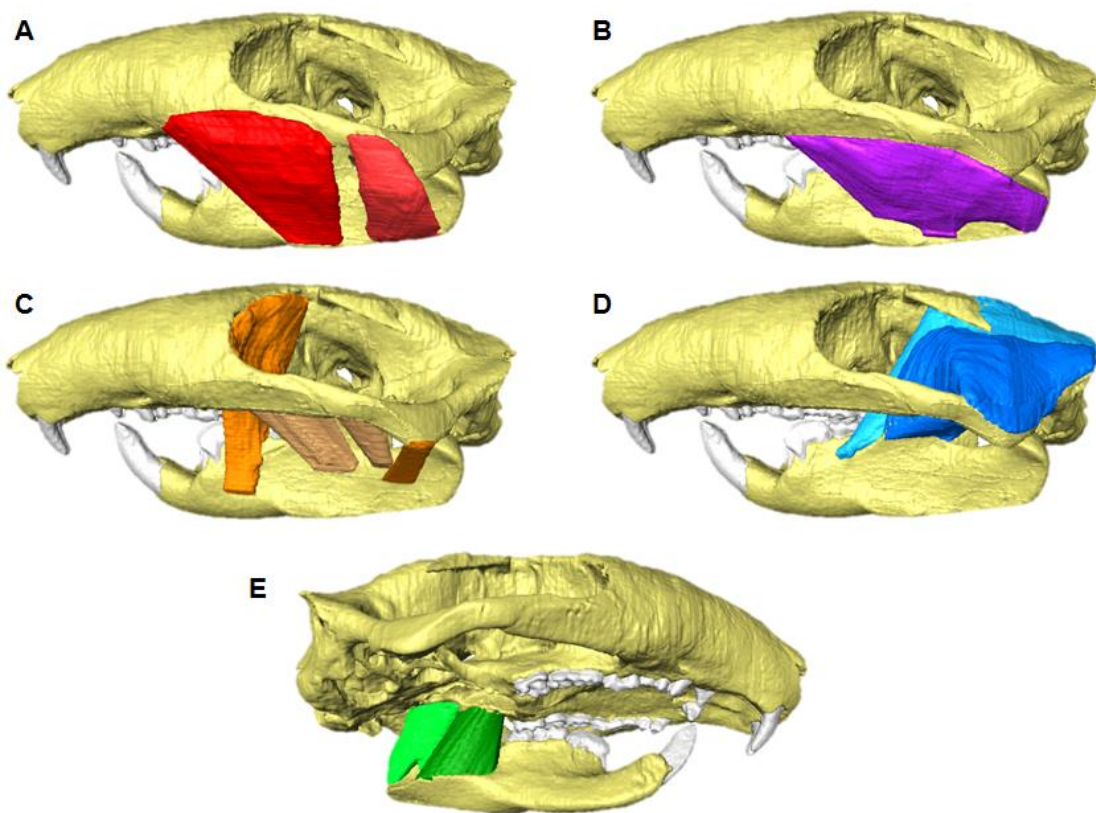

70

71 **Figure S2.** Muscle attachment sites on the hemimandibles of (a-c) *Rattus*, (d-f)  
 72 *Sciurus*, and (g-i) *Cavia*. (a), (d) and (g) in lateral view, (b), (e) and (h) in medial  
 73 view, and (c), (f) and (i) in occlusal/dorsal view. Attachment sites based on muscle  
 74 models from [1, 5].

75

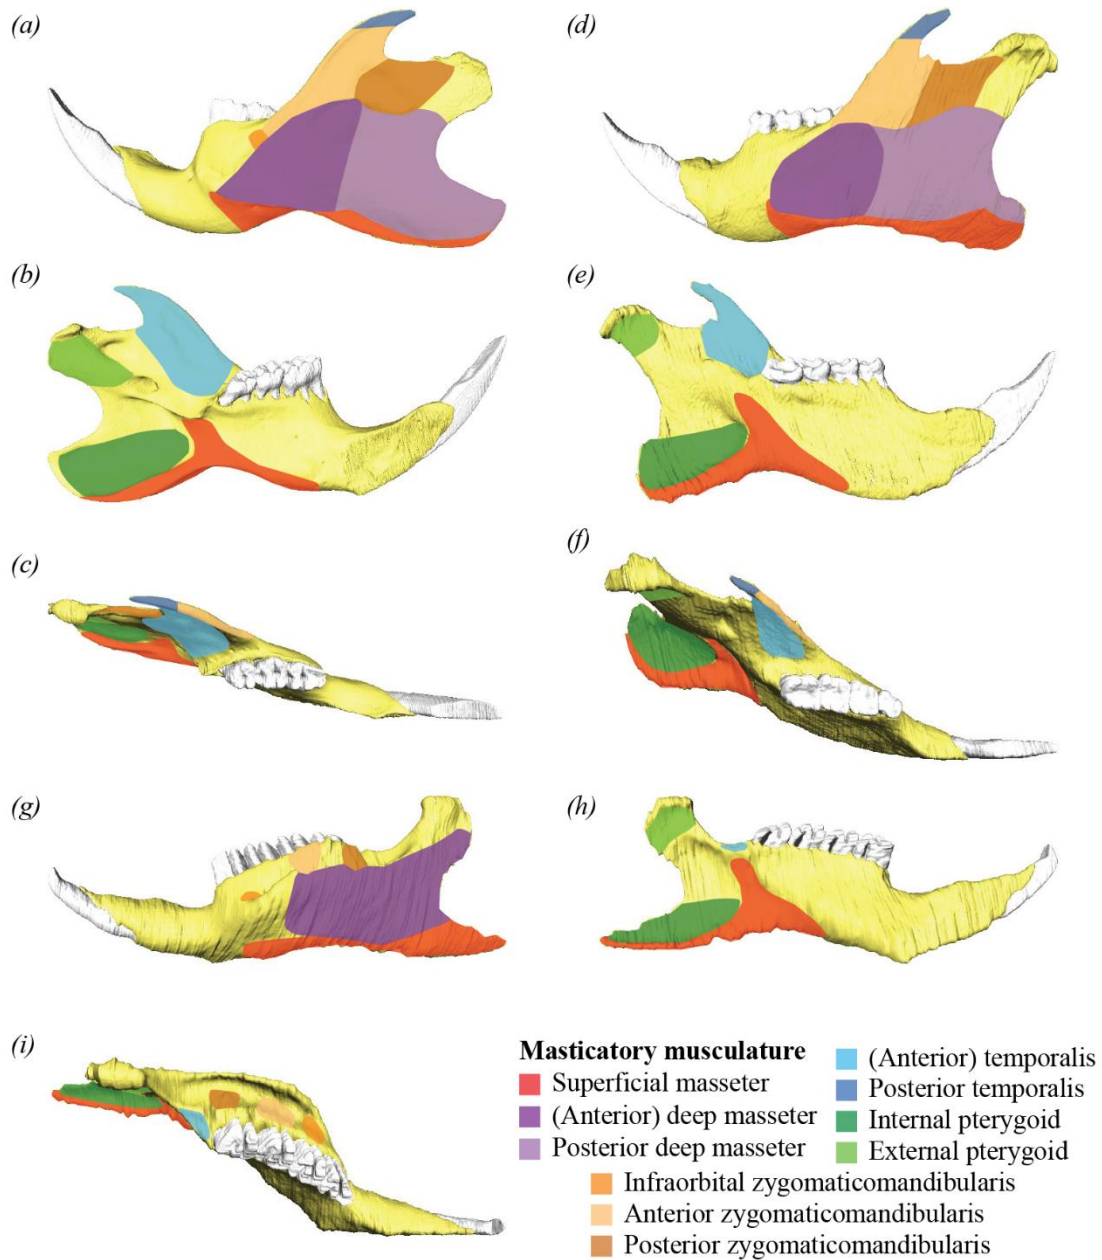

76

77 **(b) Finite element analysis**

78 **(i) FE meshes and material properties**

79 The digital models of the hemimandibles and crania were converted into 3D meshes  
 80 using HyperMesh 14.0 (Altair Engineering Inc., Troy, MI, USA). The hemimandible  
 81 meshes were composed of between 115,000 and 142,000 tetrahedral linear  
 82 elements. The cranial meshes for *Kryptobaatar* and the mouse were made up of  
 83 670,000 and 1,210,000 elements, respectively. All meshes had an average element  
 84 size of 0.25 mm. This element size was chosen to replicate that used by Cox *et al.*  
 85 [1], who used this value because it was well under 0.92 mm; the value at which FEA  
 86 results were found to converge for a pig skull [6]. Further details of each mesh are  
 87 provided below in Tables S3-S4.

88  
 89 **Table S3.** Details of finite element meshes made for the rodent and *Kryptobaatar*  
 90 hemimandibles, and calculation of muscle to bone volume ratios.

| Specimen            | Elements | Nodes | Hemimandible length (mm) | Hemimandible width (mm) | HyperMesh volume (mm <sup>3</sup> ) | Total muscle volume (mm <sup>3</sup> ) | Muscle: bone ratio |
|---------------------|----------|-------|--------------------------|-------------------------|-------------------------------------|----------------------------------------|--------------------|
| DigiMorph mouse     | 119659   | 25800 | 14.9                     | 5.7                     | 34.99                               | 299.62                                 | 8.563              |
| DigiMorph rat       | 125789   | 26224 | 33.1                     | 10.0                    | 342.52                              | 2451.76                                | 7.158              |
| Guinea pig          | 115487   | 23905 | 43.8                     | 21.0                    | 1309.49                             | 3674.39                                | 2.806              |
| Squirrel            | 119132   | 25599 | 39.7                     | 12.0                    | 752.48                              | 3405.71                                | 4.526              |
| <i>Kryptobaatar</i> | 142262   | 29599 | 18.3                     | 7.8                     | 72.22                               | 284.37                                 | 3.938              |

91

92

93 **Table S4.** Details of finite element meshes made for the mouse and *Kryptobaatar*  
 94 crania, and calculation of muscle to bone volume ratios.

| Specimen            | Elements | Nodes  | Skull length (mm) | Skull width (mm) | HyperMesh volume (mm <sup>3</sup> ) | Total muscle volume (mm <sup>3</sup> ) | Muscle: bone ratio |
|---------------------|----------|--------|-------------------|------------------|-------------------------------------|----------------------------------------|--------------------|
| DigiMorph mouse     | 1214131  | 253112 | 24.9              | 13.0             | 199.40                              | 599.24                                 | 3.005              |
| <i>Kryptobaatar</i> | 672954   | 159827 | 27.3              | 20.0             | 474.99                              | 568.74                                 | 1.197              |

95 Each component of the mesh (bone, premolars-molars, and incisors) was modelled  
 96 as linearly elastic, and isotropic, homogeneous material properties were applied to  
 97 the components based on measured values from rodents [1]: a Young's modulus of  
 98 18 GPa for bone, 30 GPa for premolars-molars, 70 GPa for incisors, and a Poisson's  
 99 ratio of 0.3 for all materials.

100

101 The effects of varying these material properties were explored in sensitivity analyses,  
 102 to account for the fact that material properties cannot be validated for lithified fossils.  
 103 Six analyses were undertaken for each bite point in the *Kryptobaatar* models (Tables  
 104 S5-S7). In three tests (1, 3 and 5) the Poisson's ratio was kept constant at 0.3 and  
 105 the Young's modulus was varied using low, intermediate and high estimates. In tests  
 106 2, 4 and 6 the Poisson's ratio was raised to 0.33. The values chosen were based on  
 107 similar sensitivity analyses of rodent skulls by Cox *et al.* [7]. As shown in Tables S6-  
 108 S7, differences in average stress values were minimal despite changes in material  
 109 properties.

110

111 **Table S5.** Material properties used in the six sensitivity analyses of the *Kryptobaatar*  
 112 hemimandible and cranium finite element models.

| Test number | Young's Modulus (GPa) |                  |          | Poisson's ratio |
|-------------|-----------------------|------------------|----------|-----------------|
|             | Bone                  | Premolars-Molars | Incisors |                 |
| 1           | 10                    | 20               | 15       | 0.3             |
| 2           | 10                    | 20               | 15       | 0.33            |
| 3           | 20                    | 30               | 50       | 0.3             |
| 4           | 20                    | 30               | 50       | 0.33            |
| 5           | 30                    | 40               | 80       | 0.3             |
| 6           | 30                    | 40               | 80       | 0.33            |

113



114 **Table S6.** Median von Mises stress values (in MPa) from the sensitivity tests of the  
 115 *Kryptobaatar* hemimandible, showing maximum and minimum values and the  
 116 difference between them.

|           | Test 1 | Test 2 | Test 3 | Test 4 | Test 5 | Test 6 | Max   | Min   | Diff. |
|-----------|--------|--------|--------|--------|--------|--------|-------|-------|-------|
| <b>i1</b> | 3.020  | 3.012  | 3.020  | 3.010  | 3.008  | 2.999  | 3.020 | 2.999 | 0.021 |
| <b>p4</b> | 1.316  | 1.313  | 1.370  | 1.367  | 1.376  | 1.373  | 1.376 | 1.313 | 0.063 |
| <b>m1</b> | 1.194  | 1.189  | 1.234  | 1.229  | 1.239  | 1.234  | 1.239 | 1.189 | 0.050 |
| <b>m2</b> | 1.498  | 1.487  | 1.624  | 1.612  | 1.657  | 1.646  | 1.657 | 1.487 | 0.170 |

117

118

119 **Table S7.** Median von Mises stress values (in MPa) from the sensitivity tests of the  
 120 *Kryptobaatar* cranium, showing maximum and minimum values and the difference  
 121 between them.

|           | Test 1 | Test 2 | Test 3 | Test 4 | Test 5 | Test 6 | Max   | Min   | Diff. |
|-----------|--------|--------|--------|--------|--------|--------|-------|-------|-------|
| <b>I2</b> | 1.123  | 1.121  | 1.123  | 1.120  | 1.123  | 1.120  | 1.123 | 1.120 | 0.003 |
| <b>I3</b> | 1.051  | 1.049  | 1.047  | 1.045  | 1.045  | 1.043  | 1.051 | 1.043 | 0.008 |
| <b>P1</b> | 0.889  | 0.887  | 0.887  | 0.884  | 0.886  | 0.883  | 0.889 | 0.883 | 0.006 |
| <b>P2</b> | 0.860  | 0.858  | 0.858  | 0.855  | 0.857  | 0.854  | 0.860 | 0.854 | 0.006 |
| <b>P3</b> | 0.800  | 0.798  | 0.798  | 0.795  | 0.797  | 0.794  | 0.800 | 0.794 | 0.006 |
| <b>P4</b> | 0.716  | 0.713  | 0.715  | 0.712  | 0.714  | 0.711  | 0.716 | 0.711 | 0.005 |
| <b>M1</b> | 0.632  | 0.629  | 0.629  | 0.627  | 0.628  | 0.625  | 0.632 | 0.625 | 0.007 |

122

123

124 **(ii) Model constraints**

125 The mouse and *Kryptobaatar* cranial models were constrained in a comparable way  
 126 to the cranial models of Cox *et al.* [1]. Two nodes were constrained in all three  
 127 dimensions at each temporomandibular joint (TMJ). Bilateral biting was assumed  
 128 since multituberculates are thought to have only employed bilateral biting [8] and  
 129 rats, myomorphs with similar dental and occlusal morphology to mice, are known to  
 130 chew bilaterally [9]. Therefore, one node was constrained in the axis of the bite  
 131 (perpendicular to the occlusal surface) on each biting tooth on the tallest cusp, which  
 132 would come into contact with food items first. For the hemimandibular models: three

133 nodes were constrained in all three dimensions across the surface of the condyle at  
134 the TMJ; five nodes were constrained across the mandibular symphysis in the  
135 mediolateral axis to mimic the connection with the opposing hemimandible; and a  
136 number of nodes, between one and seven, were constrained in the axis of the bite  
137 across the occlusal surface of each biting tooth. A node was constrained at the tip of  
138 each cusp on the tooth, or nodes were spaced evenly across the surface of teeth  
139 with flat occlusal surfaces, to simulate even contact with food items during biting. A  
140 variable number of nodes were constrained on the biting tooth due to the variable  
141 number of cusps on different teeth.

142

### 143 **(iii) Input muscle forces and scaling of DigiMorph specimens**

144 Input muscle forces from Cox *et al.* [1] were used for the squirrel, guinea pig and rat,  
145 and forces calculated herein (Tables S1-S2) were used for the mouse and  
146 *Kryptobaatar*. The CT scans used by Cox *et al.* [1] and Baverstock *et al.* [3] were  
147 obtained using iodine-based, contrast-enhanced CT. This method increases the  
148 attenuation in soft tissues through sorption of an iodine-potassium iodide (I<sub>2</sub>KI)  
149 contrast solution, producing superior detail in muscle tissues [10]. However, since  
150 bone does not take up the contrast solution at a similar rate to soft tissues it is more  
151 difficult to distinguish boundaries between bone and muscle in resulting CT images  
152 [3], rendering automated segmentation of bone impossible. For ease of labelling in  
153 Avizo, the rat and mouse models were created using non-contrast enhanced CT  
154 scans from DigiMorph. These scans were also of specimens devoid of soft tissues  
155 making labelling much simpler. However, to use the input forces calculated from the  
156 rat and mouse specimens of Cox *et al.* [1] and Baverstock *et al.* [3] in the FE models,  
157 the DigiMorph specimens were scaled up in HyperMesh to the same mandibular

158 lengths as the specimens from which muscle forces were determined. The scale  
159 factors used were 1.195 for the mouse and 1.060 for the rat. The force for each  
160 muscle was divided evenly over a number of nodes (between 15 and 120) across the  
161 origin sites on the crania and attachment sites on the hemimandibles, and a vector  
162 was created in HyperMesh between the origin and attachment site of each muscle to  
163 provide the load orientation.

164

### 165 **(c) Calculating bite force quotient (BFQ)**

166 BFQ was calculated using the equation from Wroe *et al.* [11]:

$$167 \quad BFQ = \frac{B_S}{10^{(0.6014 \times \log_{10} BoM + 1.7137)}} \times 100$$

168 where  $BFQ$  = bite force quotient,  $B_S$  = bite force (N),  $BoM$  = body mass (kg).

169

170 Body mass estimates were taken from the Animal Ageing and Longevity Database  
171 (AnAge: <http://genomics.senescence.info/species>) for extant rodents, and from  
172 Kielan-Jaworowska and Lancaster [12] for *Kryptobaatar*. BFQ was calculated for  
173 biting at the incisors and rearmost molars in all taxa, and at the fourth lower premolar  
174 for *Kryptobaatar*.

175

### 176 **(d) Biomechanical analysis in MomentMacro**

177 The Avizo label files of the hemimandibles and rostra were exported separately as  
178 individual TIF image stacks for each taxon, with bones and teeth labelled white on a  
179 black background to simplify thresholding. The image stacks were imported into the  
180 plugin MomentMacro v1.4B (<http://www.hopkinsmedicine.org/fae/mmacro.html>) in  
181 ImageJ v1.51h (National Institutes of Health, Bethesda, MD, USA) to calculate the  
182 section moduli and polar moments of inertia. Calculations were performed every 20

183 slices along the hemimandibles and rostra for the rat, mouse, guinea pig and squirrel  
 184 image stacks and every 10 slices for the *Kryptobaatar* stacks due to the lower  
 185 resolution of the scan. To correct for size discrepancies and to simply evaluate the  
 186 effect of morphology, each model was rescaled to the length of the hemimandible of  
 187 the rat specimen from DigiMorph by modifying the resolution of each TIF image.  
 188 Scales used for each analysis (Table S8), as well as MomentMacro data from scaled  
 189 analysis for the hemimandibles (Tables S9-S13) and rostra (Tables S14-S19), are  
 190 provided below.

191

192 **Table S8.** The mandible lengths and scales used for the scaled MomentMacro  
 193 analysis.

| <b>Specimen</b>                         | <b>Mandible length (mm)</b>                         | <b>Scale (pixels per mm)</b> |
|-----------------------------------------|-----------------------------------------------------|------------------------------|
| DigiMorph rat                           | 31.2                                                | 36.47                        |
| DigiMorph mouse                         | Scaled to same length as DigiMorph rat hemimandible | 31.26                        |
| Mouse (Baverstock <i>et al.</i> , 2013) |                                                     | 14.12                        |
| Squirrel (Cox <i>et al.</i> , 2012)     |                                                     | 15.71                        |
| Guinea pig (Cox <i>et al.</i> , 2012)   |                                                     | 17.71                        |
| Rat (Cox <i>et al.</i> , 2012)          |                                                     | 22.48                        |
| <i>Kryptobaatar</i>                     |                                                     | 14.00                        |

194

195 **Table S9.** MomentMacro data from the scaled DigiMorph mouse hemimandible  
 196 analysis.

| Slice number | % along mandible | $I_x$ (mm <sup>4</sup> ) | $I_y$ (mm <sup>4</sup> ) | $J$ (mm <sup>4</sup> ) | $Z_x$ (mm <sup>3</sup> ) | $Z_y$ (mm <sup>3</sup> ) | $Z_p$ (mm <sup>3</sup> ) |
|--------------|------------------|--------------------------|--------------------------|------------------------|--------------------------|--------------------------|--------------------------|
| 93           | 100.00           | 0.001478                 | 0.001504                 | 0.002982               | 0.006511                 | 0.006434                 | 0.01343                  |
| 100          | 97.49            | 0.04654                  | 0.03146                  | 0.078                  | 0.0803                   | 0.06553                  | 0.1403                   |
| 120          | 92.92            | 0.4972                   | 0.22                     | 0.7172                 | 0.4738                   | 0.3118                   | 0.6929                   |
| 140          | 88.36            | 1.4416                   | 0.4086                   | 1.8503                 | 1.0422                   | 0.5465                   | 1.3612                   |
| 160          | 83.79            | 2.4535                   | 0.4807                   | 2.9342                 | 1.4975                   | 0.623                    | 1.7829                   |
| 180          | 79.22            | 2.5332                   | 0.862                    | 3.3952                 | 1.6453                   | 0.9686                   | 2.1873                   |
| 200          | 74.66            | 4.1615                   | 2.0211                   | 6.1826                 | 2.4294                   | 1.5772                   | 3.4412                   |
| 220          | 70.09            | 5.769                    | 2.8453                   | 8.6143                 | 3.2108                   | 2.1286                   | 4.2534                   |
| 240          | 65.53            | 6.4383                   | 3.0752                   | 9.5135                 | 3.2601                   | 2.0785                   | 4.5988                   |
| 260          | 60.96            | 8.7126                   | 5.0264                   | 13.739                 | 4.4964                   | 3.0436                   | 6.1456                   |
| 280          | 56.39            | 56.1057                  | 15.4599                  | 71.5656                | 11.438                   | 6.8448                   | 13.9645                  |
| 300          | 51.83            | 79.7338                  | 18.1843                  | 97.9181                | 17.1749                  | 7.5413                   | 20.3112                  |
| 320          | 47.26            | 70.8064                  | 15.65                    | 86.4564                | 15.6866                  | 7.1184                   | 18.9398                  |
| 340          | 42.69            | 78.3019                  | 17.858                   | 96.1599                | 19.5245                  | 7.5968                   | 23.9348                  |
| 360          | 38.13            | 74.6568                  | 26.6977                  | 101.3545               | 16.6993                  | 9.0309                   | 19.1589                  |
| 380          | 33.56            | 81.2609                  | 34.4332                  | 115.6941               | 13.273                   | 9.5865                   | 16.4379                  |
| 400          | 29.00            | 110.3722                 | 36.4508                  | 146.8231               | 16.6257                  | 9.408                    | 19.4116                  |
| 420          | 24.43            | 93.7861                  | 26.2961                  | 120.0821               | 14.1638                  | 7.2585                   | 16.1275                  |
| 440          | 19.86            | 53.936                   | 13.7756                  | 67.7116                | 10.3637                  | 3.4468                   | 11.0353                  |
| 460          | 15.30            | 52.8396                  | 12.3248                  | 65.1644                | 9.9518                   | 2.9715                   | 10.3952                  |
| 480          | 10.73            | 90.5473                  | 14.0337                  | 104.581                | 14.6518                  | 3.2677                   | 14.4239                  |
| 500          | 6.16             | 108.0504                 | 12.8952                  | 120.9457               | 18.0887                  | 3.5578                   | 17.6004                  |
| 520          | 1.60             | 29.4966                  | 2.77                     | 32.2665                | 4.222                    | 1.3213                   | 4.4563                   |
| 531          | 0.00             | 9.51E-05                 | 8.13E-05                 | 0.000177               | 0.000781                 | 0.000737                 | 0.001455                 |

197

198 **Table S10.** MomentMacro data from the scaled DigiMorph rat hemimandible  
 199 analysis.

| Slice number | % along mandible | $I_x$ (mm <sup>4</sup> ) | $I_y$ (mm <sup>4</sup> ) | $J$ (mm <sup>4</sup> ) | $Z_x$ (mm <sup>3</sup> ) | $Z_y$ (mm <sup>3</sup> ) | $Z_p$ (mm <sup>3</sup> ) |
|--------------|------------------|--------------------------|--------------------------|------------------------|--------------------------|--------------------------|--------------------------|
| 249          | 100.00           | 0.000121                 | 0.000219                 | 0.00034                | 0.000943                 | 0.001509                 | 0.002369                 |
| 270          | 98.86            | 0.05222                  | 0.07244                  | 0.1247                 | 0.09804                  | 0.1221                   | 0.1882                   |
| 290          | 96.96            | 0.1772                   | 0.1695                   | 0.3467                 | 0.2368                   | 0.2405                   | 0.4018                   |
| 310          | 95.06            | 0.3674                   | 0.2773                   | 0.6446                 | 0.413                    | 0.3782                   | 0.6673                   |
| 330          | 93.16            | 0.63                     | 0.3782                   | 1.0082                 | 0.6071                   | 0.4841                   | 0.9161                   |
| 350          | 91.26            | 1.0414                   | 0.4526                   | 1.494                  | 0.873                    | 0.563                    | 1.2497                   |
| 370          | 89.36            | 1.3584                   | 0.5097                   | 1.8681                 | 1.0671                   | 0.6131                   | 1.3873                   |
| 390          | 87.46            | 1.8349                   | 0.5619                   | 2.3968                 | 1.3323                   | 0.6517                   | 1.5875                   |
| 410          | 85.57            | 2.0437                   | 0.5789                   | 2.6227                 | 1.3541                   | 0.6564                   | 1.6618                   |
| 430          | 83.67            | 1.8378                   | 0.5878                   | 2.4256                 | 1.2778                   | 0.6721                   | 1.6315                   |
| 450          | 81.77            | 1.9418                   | 0.6845                   | 2.6263                 | 1.2502                   | 0.7501                   | 1.5789                   |
| 470          | 79.87            | 2.7853                   | 0.8351                   | 3.6204                 | 1.6153                   | 0.8649                   | 2.0117                   |
| 490          | 77.97            | 4.0763                   | 1.0012                   | 5.0775                 | 2.2175                   | 1.0257                   | 2.6736                   |
| 510          | 76.07            | 5.0286                   | 1.572                    | 6.6006                 | 2.6354                   | 1.3881                   | 3.2297                   |
| 530          | 74.17            | 5.5461                   | 2.1687                   | 7.7148                 | 2.7173                   | 1.6594                   | 3.3581                   |
| 550          | 72.27            | 5.895                    | 2.6956                   | 8.5906                 | 2.986                    | 1.931                    | 3.7012                   |
| 570          | 70.37            | 6.6372                   | 2.9738                   | 9.611                  | 3.339                    | 2.1773                   | 4.2854                   |
| 590          | 68.47            | 7.6805                   | 3.0705                   | 10.7509                | 3.9657                   | 2.2762                   | 4.7772                   |

|      |       |          |          |          |          |         |          |
|------|-------|----------|----------|----------|----------|---------|----------|
| 610  | 66.57 | 8.7957   | 3.3901   | 12.1858  | 4.497    | 2.5053  | 5.4981   |
| 630  | 64.67 | 10.1948  | 3.569    | 13.7638  | 4.9726   | 2.7481  | 6.1322   |
| 650  | 62.77 | 13.051   | 4.2869   | 17.3379  | 5.7989   | 3.118   | 6.84     |
| 670  | 60.87 | 59.1285  | 8.708    | 67.8364  | 9.4871   | 5.118   | 10.8608  |
| 690  | 58.97 | 113.4807 | 14.0396  | 127.5203 | 20.9585  | 7.3269  | 23.2461  |
| 710  | 57.08 | 131.171  | 16.9958  | 148.1668 | 25.2005  | 8.2354  | 28.0999  |
| 730  | 55.18 | 126.8059 | 17.7541  | 144.56   | 26.0538  | 8.5621  | 29.276   |
| 750  | 53.28 | 119.4616 | 18.1709  | 137.6325 | 25.3582  | 8.4903  | 29.0903  |
| 770  | 51.38 | 128.4187 | 17.8752  | 146.2938 | 26.2447  | 8.346   | 29.6549  |
| 790  | 49.48 | 124.5798 | 16.9484  | 141.5282 | 27.3716  | 8.1393  | 30.8708  |
| 810  | 47.58 | 112.3467 | 15.7083  | 128.055  | 24.9611  | 7.9448  | 28.1258  |
| 830  | 45.68 | 100.1597 | 15.5847  | 115.7444 | 23.0593  | 7.5285  | 24.288   |
| 850  | 43.78 | 106.2157 | 17.7161  | 123.9318 | 22.6687  | 8.3396  | 24.5519  |
| 870  | 41.88 | 109.6233 | 19.7606  | 129.3839 | 19.5042  | 9.5753  | 21.8716  |
| 890  | 39.98 | 119.2727 | 20.6833  | 139.9561 | 17.8566  | 9.8351  | 20.1666  |
| 910  | 38.08 | 119.5503 | 21.2821  | 140.8324 | 15.933   | 10.0278 | 18.1285  |
| 930  | 36.18 | 123.0654 | 22.6539  | 145.7193 | 15.5164  | 10.4556 | 17.912   |
| 950  | 34.28 | 133.5804 | 19.4269  | 153.0073 | 16.6327  | 8.0134  | 18.6693  |
| 970  | 32.38 | 144.332  | 13.906   | 158.238  | 18.176   | 6.1922  | 19.5508  |
| 990  | 30.48 | 137.3622 | 9.0834   | 146.4456 | 17.075   | 3.9248  | 17.9495  |
| 1010 | 28.58 | 89.2415  | 5.992    | 95.2335  | 10.3703  | 2.6468  | 10.9209  |
| 1030 | 26.69 | 66.1597  | 4.6999   | 70.8595  | 7.4575   | 2.1053  | 7.8914   |
| 1050 | 24.79 | 57.0622  | 4.1721   | 61.2342  | 9.7029   | 1.8857  | 10.3228  |
| 1070 | 22.89 | 56.4114  | 3.9092   | 60.3207  | 9.7165   | 1.7699  | 10.2908  |
| 1090 | 20.99 | 60.462   | 3.7527   | 64.2148  | 10.4684  | 1.6768  | 10.7178  |
| 1110 | 19.09 | 69.3404  | 3.4669   | 72.8073  | 10.9014  | 1.5522  | 11.1176  |
| 1130 | 17.19 | 77.568   | 2.9218   | 80.4899  | 11.3923  | 1.405   | 11.4895  |
| 1150 | 15.29 | 91.0758  | 2.3922   | 93.468   | 12.0469  | 1.2192  | 12.0805  |
| 1170 | 13.39 | 80.3167  | 1.779    | 82.0957  | 10.8546  | 0.9249  | 10.8045  |
| 1190 | 11.49 | 67.5653  | 1.3212   | 68.8865  | 10.2424  | 0.6919  | 10.153   |
| 1210 | 9.59  | 38.1058  | 0.8704   | 38.9763  | 5.6371   | 0.5521  | 5.7584   |
| 1230 | 7.69  | 5.5397   | 0.5486   | 6.0883   | 0.6846   | 0.3991  | 0.7521   |
| 1250 | 5.79  | 1.4624   | 0.3602   | 1.8226   | 0.6708   | 0.2979  | 0.8033   |
| 1270 | 3.89  | 0.8652   | 0.1436   | 1.0088   | 0.4878   | 0.1775  | 0.56     |
| 1290 | 1.99  | 0.28     | 0.03232  | 0.3123   | 0.2236   | 0.06352 | 0.2482   |
| 1302 | 0.00  | 0.000198 | 3.13E-05 | 0.000229 | 0.001085 | 0.00035 | 0.001414 |

200

201 **Table S11.** MomentMacro data from the scaled guinea pig hemimandible analysis.

| Slice number | % along mandible | $I_x$ (mm <sup>4</sup> ) | $I_y$ (mm <sup>4</sup> ) | $J$ (mm <sup>4</sup> ) | $Z_x$ (mm <sup>3</sup> ) | $Z_y$ (mm <sup>3</sup> ) | $Z_p$ (mm <sup>3</sup> ) |
|--------------|------------------|--------------------------|--------------------------|------------------------|--------------------------|--------------------------|--------------------------|
| 128          | 100.00           | 0.000505                 | 5.76E-05                 | 0.000563               | 0.002146                 | 0.000471                 | 0.002486                 |
| 130          | 98.98            | 0.07219                  | 0.03903                  | 0.1112                 | 0.1076                   | 0.07787                  | 0.1566                   |
| 150          | 95.58            | 0.3118                   | 0.1588                   | 0.4706                 | 0.3489                   | 0.2257                   | 0.5129                   |
| 170          | 92.18            | 0.5634                   | 0.189                    | 0.7524                 | 0.4911                   | 0.2709                   | 0.6503                   |
| 190          | 88.78            | 0.9701                   | 0.3191                   | 1.2892                 | 0.7528                   | 0.4324                   | 0.9922                   |
| 210          | 85.37            | 2.2991                   | 0.6903                   | 2.9894                 | 1.4645                   | 0.7357                   | 1.8904                   |
| 230          | 81.97            | 2.9379                   | 1.4946                   | 4.4324                 | 1.8234                   | 1.2332                   | 2.7302                   |
| 250          | 78.57            | 5.8648                   | 3.4618                   | 9.3266                 | 3.044                    | 2.3716                   | 4.7866                   |
| 270          | 75.17            | 10.3155                  | 5.6207                   | 15.9362                | 4.4839                   | 3.4888                   | 6.8136                   |
| 290          | 71.77            | 10.8565                  | 8.0952                   | 18.9517                | 4.9937                   | 4.4233                   | 8.4502                   |
| 310          | 68.37            | 9.4599                   | 8.8994                   | 18.3593                | 4.9182                   | 4.6071                   | 8.001                    |
| 330          | 64.97            | 11.6289                  | 17.6679                  | 29.2968                | 5.7006                   | 7.0346                   | 9.9841                   |
| 350          | 61.56            | 81.9723                  | 91.6822                  | 173.6545               | 19.7426                  | 21.4594                  | 33.6081                  |
| 370          | 58.16            | 125.8892                 | 147.6824                 | 273.5716               | 25.3389                  | 32.133                   | 50.07                    |
| 390          | 54.76            | 163.1843                 | 160.4266                 | 323.6109               | 34.3459                  | 32.9482                  | 64.3693                  |

|     |       |          |          |          |         |         |          |
|-----|-------|----------|----------|----------|---------|---------|----------|
| 410 | 51.36 | 158.1934 | 153.0759 | 311.2693 | 31.1126 | 31.3441 | 60.0955  |
| 430 | 47.96 | 159.7898 | 113.5291 | 273.319  | 33.6855 | 25.0478 | 56.5675  |
| 450 | 44.56 | 118.9263 | 72.9301  | 191.8563 | 25.5222 | 18.2636 | 40.9944  |
| 470 | 41.16 | 123.6569 | 50.1672  | 173.824  | 28.8381 | 13.9229 | 40.4434  |
| 490 | 37.76 | 92.2653  | 37.6546  | 129.9199 | 22.8619 | 11.4326 | 30.1356  |
| 510 | 34.35 | 58.4717  | 22.5081  | 80.9798  | 15.6998 | 8.0849  | 20.3092  |
| 530 | 30.95 | 46.1984  | 12.4356  | 58.6341  | 12.6412 | 5.4426  | 14.5801  |
| 550 | 27.55 | 49.5326  | 12.2699  | 61.8024  | 11.8296 | 4.544   | 14.3699  |
| 570 | 24.15 | 64.32    | 6.4525   | 70.7725  | 11.9943 | 2.4203  | 12.118   |
| 590 | 20.75 | 93.5149  | 7.4351   | 100.95   | 14.1849 | 2.5228  | 14.1702  |
| 610 | 17.35 | 91.3801  | 7.3216   | 98.7017  | 13.7971 | 2.3396  | 13.8463  |
| 630 | 13.95 | 60.5415  | 5.6489   | 66.1903  | 10.7466 | 2.0006  | 10.8486  |
| 650 | 10.54 | 0.3601   | 0.6058   | 0.9659   | 0.2892  | 0.4728  | 0.5836   |
| 670 | 7.14  | 0.05204  | 0.1651   | 0.2172   | 0.07818 | 0.1773  | 0.2037   |
| 690 | 3.74  | 0.06061  | 0.1122   | 0.1728   | 0.09428 | 0.1371  | 0.1862   |
| 710 | 0.34  | 0.009298 | 0.01156  | 0.02086  | 0.02494 | 0.02808 | 0.04812  |
| 716 | 0.00  | 6.78E-06 | 6.78E-06 | 1.36E-05 | 9E-05   | 9E-05   | 0.000322 |

202

203 **Table S12.** MomentMacro data from the scaled squirrel hemimandible analysis.

| Slice number | % along mandible | $I_x$ (mm <sup>4</sup> ) | $I_y$ (mm <sup>4</sup> ) | $J$ (mm <sup>4</sup> ) | $Z_x$ (mm <sup>3</sup> ) | $Z_y$ (mm <sup>3</sup> ) | $Z_p$ (mm <sup>3</sup> ) |
|--------------|------------------|--------------------------|--------------------------|------------------------|--------------------------|--------------------------|--------------------------|
| 199          | 100.00           | 0                        | 0                        | 0                      | 0                        | 0                        | 0                        |
| 200          | 98.72            | 0.001302                 | 0.001495                 | 0.002796               | 0.004646                 | 0.005821                 | 0.01109                  |
| 220          | 94.43            | 0.4575                   | 0.1586                   | 0.6161                 | 0.4228                   | 0.2389                   | 0.6026                   |
| 240          | 90.15            | 1.4971                   | 0.3609                   | 1.8579                 | 1.0225                   | 0.4995                   | 1.3229                   |
| 260          | 85.87            | 4.0083                   | 0.5016                   | 4.5099                 | 2.1009                   | 0.6398                   | 2.4293                   |
| 280          | 81.58            | 3.763                    | 0.6886                   | 4.4517                 | 1.9358                   | 0.7811                   | 2.3566                   |
| 300          | 77.30            | 7.3286                   | 1.706                    | 9.0347                 | 3.2973                   | 1.4183                   | 4.1419                   |
| 320          | 73.02            | 13.5847                  | 3.8586                   | 17.4432                | 5.4186                   | 2.6077                   | 6.9588                   |
| 340          | 68.74            | 22.0206                  | 6.2957                   | 28.3163                | 8.0951                   | 3.915                    | 10.2846                  |
| 360          | 64.45            | 38.7496                  | 8.9005                   | 47.6501                | 11.6206                  | 5.1703                   | 14.058                   |
| 380          | 60.17            | 113.4013                 | 15.1301                  | 128.5313               | 21.9463                  | 7.8511                   | 24.8687                  |
| 400          | 55.89            | 111.9041                 | 19.4033                  | 131.3074               | 23.6727                  | 9.3735                   | 27.5532                  |
| 420          | 51.61            | 132.0439                 | 21.1697                  | 153.2136               | 29.2097                  | 9.5792                   | 32.2683                  |
| 440          | 47.32            | 135.3838                 | 21.5182                  | 156.902                | 30.0536                  | 9.2696                   | 33.4848                  |
| 460          | 43.04            | 120.7213                 | 22.8955                  | 143.6167               | 28.2771                  | 8.921                    | 33.5608                  |
| 480          | 38.76            | 131.9464                 | 30.3723                  | 162.3187               | 28.4362                  | 11.3453                  | 31.184                   |
| 500          | 34.48            | 149.5191                 | 29.6943                  | 179.2134               | 24.508                   | 12.664                   | 27.8776                  |
| 520          | 30.19            | 189.1745                 | 24.4685                  | 213.643                | 26.5228                  | 11.1533                  | 29.1464                  |
| 540          | 25.91            | 170.9931                 | 12.8933                  | 183.8865               | 21.564                   | 5.3937                   | 22.7554                  |
| 560          | 21.63            | 105.3693                 | 9.0387                   | 114.408                | 11.5033                  | 3.6152                   | 12.2482                  |
| 580          | 17.34            | 86.7892                  | 8.8548                   | 95.6441                | 13.8304                  | 3.2438                   | 14.8713                  |
| 600          | 13.06            | 104.8974                 | 9.5406                   | 114.438                | 16.4512                  | 3.052                    | 17.6361                  |
| 620          | 8.78             | 203.7987                 | 9.9209                   | 213.7197               | 28.8323                  | 3.0786                   | 29.9852                  |
| 640          | 4.50             | 84.1636                  | 2.0975                   | 86.2612                | 8.6455                   | 1.0917                   | 8.7798                   |
| 660          | 0.21             | 0.1034                   | 0.129                    | 0.2324                 | 0.1568                   | 0.1796                   | 0.3012                   |
| 666          | 0.00             | 0.000434                 | 0.000522                 | 0.000955               | 0.002129                 | 0.002614                 | 0.004433                 |

204

205 **Table S13.** MomentMacro data from the scaled *Kryptobaatar* hemimandible

206 analysis.

| Slice number | % along mandible | $I_x$ (mm <sup>4</sup> ) | $I_y$ (mm <sup>4</sup> ) | $J$ (mm <sup>4</sup> ) | $Z_x$ (mm <sup>3</sup> ) | $Z_y$ (mm <sup>3</sup> ) | $Z_p$ (mm <sup>3</sup> ) |
|--------------|------------------|--------------------------|--------------------------|------------------------|--------------------------|--------------------------|--------------------------|
| 82           | 100.00           | 0.02567                  | 0.006607                 | 0.03228                | 0.04552                  | 0.01965                  | 0.06219                  |
| 90           | 95.85            | 2.3958                   | 0.3501                   | 2.746                  | 1.4005                   | 0.4764                   | 1.5878                   |
| 100          | 91.24            | 2.9718                   | 0.4296                   | 3.4013                 | 1.6203                   | 0.5204                   | 1.838                    |
| 110          | 86.64            | 3.7773                   | 1.8559                   | 5.6332                 | 2.32                     | 1.6051                   | 3.2412                   |
| 120          | 82.03            | 9.0725                   | 4.6754                   | 13.7478                | 4.5305                   | 2.9797                   | 6.5906                   |
| 130          | 77.42            | 7.7403                   | 5.3079                   | 13.0483                | 4.1468                   | 3.1774                   | 6.413                    |
| 140          | 72.81            | 22.3796                  | 16.7202                  | 39.0998                | 4.3613                   | 5.8382                   | 6.7705                   |
| 150          | 68.20            | 70.6726                  | 31.2334                  | 101.906                | 13.184                   | 11.4153                  | 18.1273                  |
| 160          | 63.59            | 88.1759                  | 26.1782                  | 114.3541               | 16.4773                  | 9.767                    | 20.612                   |
| 170          | 58.99            | 102.6841                 | 21.5245                  | 124.2086               | 19.6065                  | 8.5876                   | 23.4575                  |
| 180          | 54.38            | 108.0814                 | 20.1372                  | 128.2186               | 20.9441                  | 8.3747                   | 24.8014                  |
| 190          | 49.77            | 102.0891                 | 18.937                   | 121.0261               | 21.2371                  | 8.5844                   | 25.1107                  |
| 200          | 45.16            | 103.4501                 | 19.0083                  | 122.4585               | 24.4573                  | 7.4303                   | 28.0577                  |
| 210          | 40.55            | 119.4939                 | 26.0243                  | 145.5182               | 22.5622                  | 8.3155                   | 23.7941                  |
| 220          | 35.94            | 97.281                   | 23.4906                  | 120.7715               | 15.7026                  | 6.9877                   | 17.2169                  |
| 230          | 31.34            | 38.125                   | 11.5847                  | 49.7096                | 6.262                    | 4.2507                   | 7.4846                   |
| 240          | 26.73            | 15.4533                  | 8.5547                   | 24.008                 | 3.8067                   | 3.1569                   | 5.4795                   |
| 250          | 22.12            | 16.3189                  | 10.4183                  | 26.7373                | 4.6764                   | 3.1712                   | 7.0896                   |
| 260          | 17.51            | 19.6524                  | 10.9676                  | 30.62                  | 6.4687                   | 3.0916                   | 8.5351                   |
| 270          | 12.90            | 30.3179                  | 15.8823                  | 46.2002                | 8.7112                   | 4.2938                   | 11.6075                  |
| 280          | 8.29             | 52.815                   | 20.4602                  | 73.2752                | 14.1873                  | 5.3941                   | 15.8343                  |
| 290          | 3.69             | 36.3208                  | 11.9917                  | 48.3126                | 10.7972                  | 3.5823                   | 11.3168                  |
| 299          | 0.00             | 0.07003                  | 0.01188                  | 0.08191                | 0.08489                  | 0.03102                  | 0.0969                   |

207

208 **Table S14.** MomentMacro data from the scaled DigiMorph mouse rostrum analysis.

| Slice number | % along rostrum | $I_x$ (mm <sup>4</sup> ) | $I_y$ (mm <sup>4</sup> ) | $J$ (mm <sup>4</sup> ) | $Z_x$ (mm <sup>3</sup> ) | $Z_y$ (mm <sup>3</sup> ) | $Z_p$ (mm <sup>3</sup> ) |
|--------------|-----------------|--------------------------|--------------------------|------------------------|--------------------------|--------------------------|--------------------------|
| 3            | 100.00          | 4.19E-05                 | 0.000285                 | 0.000327               | 0.000561                 | 0.001432                 | 0.001896                 |
| 23           | 94.74           | 44.5457                  | 7.4884                   | 52.034                 | 9.9012                   | 3.1669                   | 11.4505                  |
| 43           | 89.47           | 264.6359                 | 68.6327                  | 333.2686               | 35.1245                  | 23.1527                  | 44.1701                  |
| 63           | 84.21           | 209.6296                 | 118.9861                 | 328.6156               | 31.8494                  | 34.7552                  | 49.4942                  |
| 83           | 78.95           | 123.0906                 | 129.5318                 | 252.6224               | 25.819                   | 34.5085                  | 52.0943                  |
| 103          | 73.68           | 124.6691                 | 139.4694                 | 264.1385               | 27.8095                  | 34.5915                  | 57.5653                  |
| 123          | 68.42           | 144.9074                 | 161.6936                 | 306.601                | 30.1818                  | 39.4633                  | 60.5249                  |
| 143          | 63.16           | 199.8047                 | 186.3581                 | 386.1627               | 40.1859                  | 44.2624                  | 70.1873                  |
| 163          | 57.89           | 246.5181                 | 145.5809                 | 392.0989               | 47.5019                  | 33.3424                  | 67.9691                  |
| 183          | 52.63           | 262.8689                 | 175.2828                 | 438.1516               | 48.6145                  | 26.1875                  | 65.738                   |
| 203          | 47.37           | 312.6417                 | 399.608                  | 712.2496               | 54.7876                  | 47.095                   | 84.0552                  |
| 223          | 42.11           | 393.6662                 | 1262.991                 | 1656.657               | 65.1583                  | 130.7617                 | 167.3441                 |
| 243          | 36.84           | 600.3048                 | 1469.198                 | 2069.503               | 88.7287                  | 136.9266                 | 189.7355                 |
| 263          | 31.58           | 716.0286                 | 937.2806                 | 1653.309               | 91.2528                  | 80.7635                  | 140.4876                 |
| 283          | 26.32           | 750.2075                 | 857.5286                 | 1607.736               | 82.3765                  | 71.7698                  | 132.7061                 |
| 303          | 21.05           | 625.7154                 | 632.553                  | 1258.268               | 63.3682                  | 51.6699                  | 101.1507                 |
| 323          | 15.79           | 672.2743                 | 549.8331                 | 1222.107               | 66.4553                  | 44.7008                  | 97.1668                  |
| 343          | 10.53           | 729.9995                 | 547.3529                 | 1277.352               | 72.921                   | 43.3694                  | 98.2189                  |
| 363          | 5.26            | 916.0313                 | 602.4079                 | 1518.439               | 116.4072                 | 46.8718                  | 108.4438                 |
| 383          | 0.00            | 759.3732                 | 619.5861                 | 1378.959               | 91.329                   | 46.9596                  | 94.8454                  |

209



210 **Table S15.** MomentMacro data from the scaled DigiMorph rat rostrum analysis.

| Slice number | % along rostrum | $I_x$ (mm <sup>4</sup> ) | $I_y$ (mm <sup>4</sup> ) | $J$ (mm <sup>4</sup> ) | $Z_x$ (mm <sup>3</sup> ) | $Z_y$ (mm <sup>3</sup> ) | $Z_p$ (mm <sup>3</sup> ) |
|--------------|-----------------|--------------------------|--------------------------|------------------------|--------------------------|--------------------------|--------------------------|
| 1            | 100.00          | 2.38E-05                 | 7.79E-05                 | 0.000102               | 0.000275                 | 0.000496                 | 0.000772                 |
| 20           | 97.67           | 0.05288                  | 0.9062                   | 0.9591                 | 0.1002                   | 0.5681                   | 0.5911                   |
| 40           | 95.35           | 42.6903                  | 7.4221                   | 50.1124                | 9.0525                   | 3.0257                   | 10.6753                  |
| 60           | 93.02           | 179.488                  | 50.9927                  | 230.4807               | 27.3518                  | 18.3295                  | 35.0185                  |
| 80           | 90.70           | 301.6347                 | 85.195                   | 386.8297               | 42.624                   | 27.6061                  | 54.5222                  |
| 100          | 88.37           | 444.8053                 | 120.6194                 | 565.4247               | 60.8643                  | 36.0245                  | 77.191                   |
| 120          | 86.05           | 550.1849                 | 144.1753                 | 694.3601               | 76.1094                  | 40.3395                  | 95.8914                  |
| 140          | 83.72           | 206.2115                 | 136.6234                 | 342.8349               | 34.7145                  | 37.4228                  | 56.9051                  |
| 160          | 81.40           | 161.6351                 | 135.7431                 | 297.3782               | 32.9529                  | 36.3831                  | 60.5313                  |
| 180          | 79.07           | 148.2603                 | 131.5846                 | 279.8449               | 32.6466                  | 35.245                   | 60.6985                  |
| 200          | 76.74           | 146.3605                 | 129.5138                 | 275.8743               | 34.0083                  | 35.36                    | 62.5507                  |
| 220          | 74.42           | 150.5732                 | 134.406                  | 284.9792               | 34.2929                  | 35.9753                  | 64.934                   |
| 240          | 72.09           | 160.1037                 | 139.8868                 | 299.9905               | 35.31                    | 37.3418                  | 65.8059                  |
| 260          | 69.77           | 175.1872                 | 144.9169                 | 320.1042               | 37.7985                  | 38.1788                  | 68.4658                  |
| 280          | 67.44           | 190.5226                 | 154.9656                 | 345.4882               | 41.0558                  | 39.4963                  | 72.9954                  |
| 300          | 65.12           | 208.4146                 | 172.7446                 | 381.1592               | 44.7514                  | 41.803                   | 78.166                   |
| 320          | 62.79           | 217.6327                 | 201.8337                 | 419.4664               | 46.1711                  | 45.2366                  | 83.0796                  |
| 340          | 60.47           | 232.2722                 | 162.9466                 | 395.2188               | 48.0887                  | 35.3369                  | 75.9261                  |
| 360          | 58.14           | 254.2162                 | 156.0266                 | 410.2428               | 50.5005                  | 32.5238                  | 75.7554                  |
| 380          | 55.81           | 264.9126                 | 144.9995                 | 409.912                | 49.6346                  | 29.9582                  | 72.0989                  |
| 400          | 53.49           | 270.2214                 | 174.1211                 | 444.3425               | 49.8806                  | 27.3827                  | 68.6223                  |
| 420          | 51.16           | 277.7817                 | 226.904                  | 504.6857               | 50.8305                  | 32.9005                  | 71.9079                  |
| 440          | 48.84           | 318.1516                 | 296.9789                 | 615.1305               | 59.0327                  | 40.2751                  | 82.7436                  |
| 460          | 46.51           | 340.2331                 | 346.9193                 | 687.1524               | 63.2099                  | 45.1486                  | 88.7591                  |
| 480          | 44.19           | 358.937                  | 445.7645                 | 804.7015               | 61.7457                  | 55.4518                  | 100.0768                 |
| 500          | 41.86           | 352.5422                 | 669.4418                 | 1021.984               | 54.1056                  | 78.3343                  | 119.7565                 |
| 520          | 39.53           | 383.0567                 | 912.8708                 | 1295.928               | 57.6898                  | 100.4846                 | 142.0864                 |
| 540          | 37.21           | 452.1824                 | 1036.763                 | 1488.945               | 71.7701                  | 110.7564                 | 158.5004                 |
| 560          | 34.88           | 517.9957                 | 1163.761                 | 1681.757               | 87.9571                  | 119.3645                 | 171.7921                 |
| 580          | 32.56           | 621.2303                 | 1267.367                 | 1888.598               | 97.829                   | 124.3342                 | 184.7783                 |
| 600          | 30.23           | 632.8427                 | 928.9764                 | 1561.819               | 100.4181                 | 89.2538                  | 149.0952                 |
| 620          | 27.91           | 721.7864                 | 800.681                  | 1522.467               | 104.2182                 | 75.4473                  | 142.9288                 |
| 640          | 25.58           | 776.361                  | 716.9435                 | 1493.305               | 104.9149                 | 66.7187                  | 137.9084                 |
| 660          | 23.26           | 812.9383                 | 652.0978                 | 1465.036               | 107.9157                 | 59.7483                  | 132.8945                 |
| 680          | 20.93           | 908.5582                 | 646.438                  | 1554.996               | 121.4059                 | 58.8094                  | 138.7151                 |
| 700          | 18.60           | 806.2102                 | 581.3951                 | 1387.605               | 106.6931                 | 52.4329                  | 121.9458                 |
| 720          | 16.28           | 761.7018                 | 551.113                  | 1312.815               | 96.6559                  | 49.1428                  | 114.5928                 |
| 740          | 13.95           | 733.8461                 | 556.4135                 | 1290.26                | 90.7807                  | 49.1897                  | 111.7624                 |
| 760          | 11.63           | 739.5409                 | 545.7573                 | 1285.298               | 90.2551                  | 47.8223                  | 110.0884                 |
| 780          | 9.30            | 689.2822                 | 487.2261                 | 1176.508               | 85.9256                  | 42.0868                  | 99.1165                  |
| 800          | 6.98            | 774.502                  | 474.8641                 | 1249.366               | 96.4468                  | 40.6885                  | 103.7033                 |
| 820          | 4.65            | 770.0105                 | 417.4946                 | 1187.505               | 106.1127                 | 35.4186                  | 95.4987                  |
| 840          | 2.33            | 679.9932                 | 363.3718                 | 1043.365               | 92.4943                  | 30.5513                  | 81.7309                  |
| 860          | 0.00            | 633.9319                 | 351.3472                 | 985.2791               | 86.9691                  | 29.719                   | 75.4597                  |

211

212 **Table S16.** MomentMacro data from the scaled rat (Cox *et al.* [1]) rostrum analysis.

| Slice number | % along rostrum | $I_x$ (mm <sup>4</sup> ) | $I_y$ (mm <sup>4</sup> ) | $J$ (mm <sup>4</sup> ) | $Z_x$ (mm <sup>3</sup> ) | $Z_y$ (mm <sup>3</sup> ) | $Z_p$ (mm <sup>3</sup> ) |
|--------------|-----------------|--------------------------|--------------------------|------------------------|--------------------------|--------------------------|--------------------------|
| 20           | 100.00          | 1.57E-05                 | 2.24E-05                 | 3.81E-05               | 0.000176                 | 0.000196                 | 0.000491                 |
| 40           | 96.55           | 0.1428                   | 1.9554                   | 2.0982                 | 0.1876                   | 0.9846                   | 1.0138                   |
| 60           | 93.10           | 35.9987                  | 9.7768                   | 45.7755                | 6.6708                   | 3.7523                   | 8.5524                   |
| 80           | 89.66           | 201.3905                 | 52.7121                  | 254.1025               | 30.1494                  | 18.6397                  | 38.0358                  |
| 100          | 86.21           | 386.3018                 | 101.2789                 | 487.5807               | 52.5662                  | 33.8864                  | 66.2734                  |
| 120          | 82.76           | 572.4786                 | 140.3157                 | 712.7943               | 75.7534                  | 42.6087                  | 94.2167                  |
| 140          | 79.31           | 282.5218                 | 142.471                  | 424.9929               | 30.3676                  | 41.2956                  | 45.6789                  |
| 160          | 75.86           | 190.0244                 | 141.7218                 | 331.7462               | 39.5973                  | 39.9632                  | 68.7755                  |
| 180          | 72.41           | 191.2088                 | 156.7995                 | 348.0083               | 39.2994                  | 41.5728                  | 72.1431                  |
| 200          | 68.97           | 213.5418                 | 174.6561                 | 388.1978               | 40.8123                  | 46.2376                  | 74.8168                  |
| 220          | 65.52           | 245.2237                 | 195.3284                 | 440.5521               | 45.7089                  | 51.0021                  | 82.6159                  |
| 240          | 62.07           | 284.9951                 | 229.0622                 | 514.0573               | 52.1979                  | 53.5872                  | 93.6297                  |
| 260          | 58.62           | 340.1721                 | 213.258                  | 553.4301               | 63.3883                  | 45.3796                  | 100.721                  |
| 280          | 55.17           | 394.7525                 | 206.8239                 | 601.5764               | 70.777                   | 37.5388                  | 104.2233                 |
| 300          | 51.72           | 437.0331                 | 282.7725                 | 719.8057               | 74.6514                  | 42.8564                  | 104.6665                 |
| 320          | 48.28           | 470.8908                 | 352.1847                 | 823.0755               | 80.0123                  | 48.6519                  | 110.4627                 |
| 340          | 44.83           | 516.5793                 | 521.4153                 | 1037.995               | 88.206                   | 65.4567                  | 129.9925                 |
| 360          | 41.38           | 503.5274                 | 820.7275                 | 1324.255               | 77.1944                  | 94.1123                  | 151.9402                 |
| 380          | 37.93           | 502.4221                 | 1121.358                 | 1623.78                | 74.157                   | 120.2981                 | 172.8435                 |
| 400          | 34.48           | 644.6777                 | 1443.605                 | 2088.282               | 105.6617                 | 146.0675                 | 209.1202                 |
| 420          | 31.03           | 792.3278                 | 1466.086                 | 2258.414               | 116.5997                 | 142.8546                 | 217.6951                 |
| 440          | 27.59           | 844.6041                 | 971.43                   | 1816.034               | 119.5284                 | 92.2162                  | 169.4079                 |
| 460          | 24.14           | 954.1741                 | 793.6998                 | 1747.874               | 124.9168                 | 73.8247                  | 160.3583                 |
| 480          | 20.69           | 996.9571                 | 661.8514                 | 1658.809               | 126.4931                 | 60.383                   | 149.2003                 |
| 500          | 17.24           | 1016.196                 | 622.3166                 | 1638.513               | 133.3863                 | 56.0619                  | 144.4117                 |
| 520          | 13.79           | 979.6968                 | 600.5442                 | 1580.241               | 132.9117                 | 53.5463                  | 136.2166                 |
| 540          | 10.34           | 948.63                   | 520.8063                 | 1469.436               | 129.9026                 | 45.9341                  | 124.3901                 |
| 560          | 6.90            | 827.888                  | 439.3974                 | 1267.285               | 109.6119                 | 37.8668                  | 104.7701                 |
| 580          | 3.45            | 931.791                  | 459.7777                 | 1391.569               | 115.1583                 | 39.3441                  | 112.2391                 |
| 600          | 0.00            | 770.1442                 | 434.4367                 | 1204.581               | 96.1499                  | 36.6301                  | 93.1898                  |

213

214 **Table S17.** MomentMacro data from the scaled guinea pig rostrum analysis.

| Slice number | % along rostrum | $I_x$ (mm <sup>4</sup> ) | $I_y$ (mm <sup>4</sup> ) | $J$ (mm <sup>4</sup> ) | $Z_x$ (mm <sup>3</sup> ) | $Z_y$ (mm <sup>3</sup> ) | $Z_p$ (mm <sup>3</sup> ) |
|--------------|-----------------|--------------------------|--------------------------|------------------------|--------------------------|--------------------------|--------------------------|
| 70           | 100.00          | 0.002886                 | 0.000963                 | 0.003849               | 0.004668                 | 0.004187                 | 0.006573                 |
| 90           | 96.43           | 261.4551                 | 26.503                   | 287.9581               | 27.0251                  | 13.0755                  | 29.7514                  |
| 110          | 92.86           | 721.987                  | 46.7365                  | 768.7234               | 79.5441                  | 14.835                   | 83.0019                  |
| 130          | 89.29           | 541.2388                 | 159.2559                 | 700.4947               | 77.52                    | 36.7374                  | 96.8547                  |
| 150          | 85.71           | 480.655                  | 178.3533                 | 659.0083               | 72.6916                  | 36.4555                  | 98.2529                  |
| 170          | 82.14           | 426.701                  | 191.6677                 | 618.3687               | 67.8219                  | 37.8509                  | 96.5527                  |
| 190          | 78.57           | 408.8239                 | 244.287                  | 653.1109               | 65.2784                  | 46.6323                  | 101.3708                 |
| 210          | 75.00           | 412.7211                 | 327.1733                 | 739.8944               | 65.9499                  | 62.1378                  | 112.9434                 |
| 230          | 71.43           | 441.4153                 | 450.8196                 | 892.2349               | 70.8961                  | 87.1588                  | 137.2367                 |
| 250          | 67.86           | 460.5817                 | 516.2022                 | 976.7839               | 71.7187                  | 92.0011                  | 151.8551                 |
| 270          | 64.29           | 555.929                  | 568.6558                 | 1124.585               | 82.2197                  | 98.6137                  | 165.3641                 |
| 290          | 60.71           | 665.7328                 | 547.7828                 | 1213.516               | 102.6165                 | 94.4465                  | 176.8823                 |
| 310          | 57.14           | 724.4471                 | 577.2282                 | 1301.675               | 114.3455                 | 99.4007                  | 184.8552                 |
| 330          | 53.57           | 862.3837                 | 573.5106                 | 1435.894               | 125.8132                 | 91.4052                  | 192.6435                 |
| 350          | 50.00           | 1066.378                 | 897.6754                 | 1964.054               | 131.6253                 | 114.9603                 | 222.5866                 |
| 370          | 46.43           | 1467.596                 | 1903.109                 | 3370.705               | 161.882                  | 192.0973                 | 322.5345                 |
| 390          | 42.86           | 1832.208                 | 2907.584                 | 4739.792               | 183.28                   | 262.9064                 | 404.4982                 |

|     |       |          |          |          |          |          |          |
|-----|-------|----------|----------|----------|----------|----------|----------|
| 410 | 39.29 | 1988.523 | 4214.86  | 6203.383 | 192.8389 | 354.7938 | 498.4496 |
| 430 | 35.71 | 2365.571 | 5124.551 | 7490.122 | 223.9016 | 395.9729 | 576.9268 |
| 450 | 32.14 | 2844.495 | 5790.759 | 8635.254 | 285.3019 | 428.3216 | 636.778  |
| 470 | 28.57 | 2586.393 | 4834.393 | 7420.787 | 262.5917 | 343.3184 | 515.9043 |
| 490 | 25.00 | 2667.866 | 3917.578 | 6585.443 | 261.778  | 271.9259 | 445.7605 |
| 510 | 21.43 | 2452.576 | 3769.4   | 6221.976 | 239.331  | 253.0964 | 405.4178 |
| 530 | 17.86 | 2250.158 | 3597.252 | 5847.411 | 216.9406 | 235.1071 | 370.6729 |
| 550 | 14.29 | 2361.382 | 3648.36  | 6009.743 | 230.7778 | 231.4886 | 368.5371 |
| 570 | 10.71 | 2295.701 | 3284.811 | 5580.512 | 232.9158 | 204.1211 | 333.0773 |
| 590 | 7.14  | 1979.189 | 2732.558 | 4711.746 | 192.7959 | 167.1153 | 279.5081 |
| 610 | 3.57  | 1752.29  | 2274.113 | 4026.403 | 171.7386 | 138.3477 | 235.3412 |
| 630 | 0.00  | 1432.489 | 1869.713 | 3302.202 | 165.1404 | 114.7328 | 187.8588 |

215

216 **Table S18.** MomentMacro data from the scaled squirrel rostrum analysis.

| Slice number | % along rostrum | $I_x$ (mm <sup>4</sup> ) | $I_y$ (mm <sup>4</sup> ) | $J$ (mm <sup>4</sup> ) | $Z_x$ (mm <sup>3</sup> ) | $Z_y$ (mm <sup>3</sup> ) | $Z_p$ (mm <sup>3</sup> ) |
|--------------|-----------------|--------------------------|--------------------------|------------------------|--------------------------|--------------------------|--------------------------|
| 9            | 100.00          | 0.002728                 | 0.00105                  | 0.003778               | 0.01008                  | 0.004628                 | 0.0146                   |
| 30           | 96.56           | 1.4971                   | 18.4773                  | 19.9744                | 1.2933                   | 5.9804                   | 6.1761                   |
| 50           | 93.12           | 5.6091                   | 48.0745                  | 53.6836                | 2.4373                   | 12.1342                  | 11.9434                  |
| 70           | 89.67           | 18.3237                  | 85.7373                  | 104.061                | 4.7576                   | 19.3375                  | 20.1218                  |
| 90           | 86.23           | 379.7889                 | 218.6734                 | 598.4623               | 60.4882                  | 44.2552                  | 94.1815                  |
| 110          | 82.79           | 805.2034                 | 483.1495                 | 1288.353               | 99.8779                  | 97.7558                  | 158.3047                 |
| 130          | 79.35           | 1597.024                 | 698.2587                 | 2295.283               | 179.8255                 | 138.7058                 | 256.8181                 |
| 150          | 75.90           | 2346.006                 | 764.0708                 | 3110.077               | 227.6547                 | 145.9947                 | 302.3293                 |
| 170          | 72.46           | 1404.534                 | 805.3501                 | 2209.884               | 150.3932                 | 144.8048                 | 235.7335                 |
| 190          | 69.02           | 1117.863                 | 792.5629                 | 1910.426               | 141.6457                 | 137.9815                 | 243.6704                 |
| 210          | 65.58           | 1047.353                 | 816.9654                 | 1864.318               | 127.1356                 | 140.0876                 | 226.4435                 |
| 230          | 62.13           | 1075.291                 | 914.9934                 | 1990.284               | 128.9057                 | 149.5429                 | 238.1337                 |
| 250          | 58.69           | 1225.435                 | 985.5899                 | 2211.025               | 152.7443                 | 138.53                   | 242.2821                 |
| 270          | 55.25           | 1494.03                  | 1138.591                 | 2632.621               | 183.5449                 | 136.5819                 | 267.5023                 |
| 290          | 51.81           | 1708.963                 | 1527.681                 | 3236.644               | 201.6009                 | 162.2857                 | 309.5096                 |
| 310          | 48.36           | 1924.937                 | 1872.13                  | 3797.067               | 230.5595                 | 173.6451                 | 327.2131                 |
| 330          | 44.92           | 1830.959                 | 2014.063                 | 3845.023               | 208.8495                 | 168.4448                 | 311.3221                 |
| 350          | 41.48           | 2070.007                 | 2784.578                 | 4854.585               | 220.5768                 | 215.2848                 | 371.9057                 |
| 370          | 38.04           | 2191.303                 | 4574.492                 | 6765.795               | 216.4618                 | 317.7336                 | 470.5227                 |
| 390          | 34.60           | 2780.351                 | 4704.553                 | 7484.904               | 265.0769                 | 300.3537                 | 474.7861                 |
| 410          | 31.15           | 4012.11                  | 5046.6                   | 9058.711               | 353.6154                 | 317.014                  | 566.6118                 |
| 430          | 27.71           | 5226.525                 | 6489.636                 | 11716.16               | 480.4384                 | 397.1871                 | 714.3453                 |
| 450          | 24.27           | 5561.196                 | 6115.455                 | 11676.65               | 518.3402                 | 357.6422                 | 671.6355                 |
| 470          | 20.83           | 5989.743                 | 4688.192                 | 10677.94               | 525.428                  | 265.8366                 | 599.7651                 |
| 490          | 17.38           | 5227.874                 | 3916.899                 | 9144.772               | 432.8024                 | 220.7964                 | 495.4726                 |
| 510          | 13.94           | 5401.186                 | 3706.553                 | 9107.739               | 465.7133                 | 204.754                  | 490.0961                 |
| 530          | 10.50           | 4316.366                 | 3436.796                 | 7753.162               | 365.6204                 | 186.3732                 | 407.5363                 |
| 550          | 7.06            | 4722.314                 | 3774.458                 | 8496.772               | 411.4521                 | 203.5219                 | 448.4726                 |
| 570          | 3.61            | 4250.158                 | 4011.212                 | 8261.37                | 371.2707                 | 215.621                  | 427.6634                 |
| 590          | 0.00            | 3267.277                 | 3750.362                 | 7017.639               | 302.7469                 | 198.8558                 | 354.6678                 |

217

218 **Table S19.** MomentMacro data from the scaled *Kryptobaatar* rostrum analysis.

| Slice number | % along rostrum | $I_x$ (mm <sup>4</sup> ) | $I_y$ (mm <sup>4</sup> ) | $J$ (mm <sup>4</sup> ) | $Z_x$ (mm <sup>3</sup> ) | $Z_y$ (mm <sup>3</sup> ) | $Z_p$ (mm <sup>3</sup> ) |
|--------------|-----------------|--------------------------|--------------------------|------------------------|--------------------------|--------------------------|--------------------------|
| 6            | 100.00          | 0.006607                 | 0.06138                  | 0.06799                | 0.02268                  | 0.08182                  | 0.09818                  |
| 10           | 95.10           | 0.1012                   | 1.5759                   | 1.6771                 | 0.1691                   | 0.9385                   | 1.0362                   |
| 20           | 90.20           | 39.4751                  | 61.4148                  | 100.8899               | 10.6973                  | 16.0667                  | 25.6671                  |
| 30           | 85.29           | 166.0458                 | 216.3622                 | 382.408                | 42.6711                  | 48.451                   | 78.5624                  |
| 40           | 80.39           | 453.7057                 | 502.7599                 | 956.4656               | 78.6628                  | 93.201                   | 159.1744                 |
| 50           | 75.49           | 361.916                  | 737.6145                 | 1099.531               | 45.4023                  | 120.7453                 | 138.56                   |
| 60           | 70.59           | 361.2372                 | 1095.165                 | 1456.402               | 79.7755                  | 158.8397                 | 212.7677                 |
| 70           | 65.69           | 410.8668                 | 962.541                  | 1373.408               | 89.4921                  | 126.496                  | 180.985                  |
| 80           | 60.78           | 447.6968                 | 1007.566                 | 1455.262               | 89.2478                  | 120.0169                 | 172.3632                 |
| 90           | 55.88           | 501.9771                 | 1332.194                 | 1834.171               | 103.874                  | 143.9796                 | 199.5085                 |
| 100          | 50.98           | 607.851                  | 1673.377                 | 2281.228               | 103.4829                 | 162.079                  | 222.0365                 |
| 110          | 46.08           | 632.312                  | 2014.264                 | 2646.576               | 104.6341                 | 181.2863                 | 237.1992                 |
| 120          | 41.18           | 652.6757                 | 2130.894                 | 2783.57                | 108.5079                 | 181.3021                 | 231.7053                 |
| 130          | 36.27           | 757.627                  | 2361.84                  | 3119.467               | 120.0495                 | 192.7495                 | 246.5276                 |
| 140          | 31.37           | 875.3652                 | 2637.274                 | 3512.639               | 128.3243                 | 205.6354                 | 265.7977                 |
| 150          | 26.47           | 1001.418                 | 5133.181                 | 6134.599               | 147.3944                 | 379.1267                 | 441.3557                 |
| 160          | 21.57           | 932.2033                 | 3019.508                 | 3951.711               | 145.5502                 | 211.8363                 | 271.2455                 |
| 170          | 16.67           | 810.5445                 | 2279.014                 | 3089.559               | 126.4529                 | 154.4664                 | 206.4916                 |
| 180          | 11.76           | 968.7076                 | 2420.404                 | 3389.112               | 140.7215                 | 159.4175                 | 220.8041                 |
| 190          | 6.86            | 1245.915                 | 2353.154                 | 3599.069               | 178.3682                 | 151.4252                 | 228.5605                 |
| 200          | 1.96            | 1236.959                 | 2114.403                 | 3351.362               | 169.6029                 | 131.8192                 | 206.6001                 |
| 210          | 0.00            | 989.8609                 | 2023.481                 | 3013.342               | 155.3728                 | 121.8101                 | 175.6657                 |

219

220

221 **(e) Shapiro-Wilk test of normality for  $Z_x$ ,  $Z_y$  and  $J$  data**

222 The  $Z_x$ ,  $Z_y$  and  $J$  data from MomentMacro were tested for normality using the

223 Shapiro-Wilk test (Table S20) in SPSS Statistics 23 (IBM Corp., Armonk, NY, USA).

224 Only the  $Z_x$  data for the rostra passed the test in each taxon, so the non-parametric

225 Wilcoxon signed-rank test was used to test for significant differences in resistance to

226 bending and torsion.

227 **Table S20.** Results of the Shapiro-Wilk test of normality for the  $Z_x$ ,  $Z_y$  and  $J$  data,  
 228 sampled every 5% along the mandibles and rostra. Those highlighted in grey passed  
 229 the test (sig. >0.05) and are likely to be normally distributed.

|                 |                          | Shapiro-Wilk |       |       |
|-----------------|--------------------------|--------------|-------|-------|
|                 |                          | Statistic    | df    | Sig.  |
| <b>Mandible</b> | <i>Kryptobaatar Zx</i>   | .908         | 21    | 0.051 |
|                 | Mouse Zx                 | .874         | 21    | 0.011 |
|                 | Rat Zx                   | .873         | 21    | 0.011 |
|                 | Guinea pig Zx            | .858         | 21    | 0.006 |
|                 | Squirrel Zx              | .873         | 21    | 0.011 |
|                 | <i>Kryptobaatar Zy</i>   | .948         | 21    | 0.309 |
|                 | Mouse Zy                 | .881         | 21    | 0.016 |
|                 | Rat Zy                   | .817         | 21    | 0.001 |
|                 | Guinea pig Zy            | .739         | 21    | 0.000 |
|                 | Squirrel Zy              | .893         | 21    | 0.026 |
|                 | <i>Kryptobaatar J</i>    | .872         | 21    | 0.010 |
|                 | Mouse J                  | .842         | 21    | 0.003 |
|                 | Rat J                    | .816         | 21    | 0.001 |
|                 | Guinea pig J             | .774         | 21    | 0.000 |
|                 | Squirrel J               | .882         | 21    | 0.016 |
| <b>Rostrum</b>  | <i>Kryptobaatar Zx</i>   | .941         | 21    | 0.231 |
|                 | Mouse Zx                 | .982         | 21    | 0.956 |
|                 | DigiMorph rat Zx         | .967         | 21    | 0.658 |
|                 | Cox <i>et al.</i> rat Zx | .942         | 21    | 0.237 |
|                 | Guinea pig Zx            | .939         | 21    | 0.209 |
|                 | Squirrel Zx              | .953         | 21    | 0.381 |
|                 | <i>Kryptobaatar Zy</i>   | .903         | 21    | 0.040 |
|                 | Mouse Zy                 | .825         | 21    | 0.002 |
|                 | DigiMorph rat Zy         | .888         | 21    | 0.021 |
|                 | Cox <i>et al.</i> rat Zy | .844         | 21    | 0.003 |
|                 | Guinea pig Zy            | .916         | 21    | 0.074 |
|                 | Squirrel Zy              | .951         | 21    | 0.360 |
|                 | <i>Kryptobaatar J</i>    | .946         | 21    | 0.291 |
|                 | Mouse J                  | .882         | 21    | 0.016 |
|                 | DigiMorph rat J          | .912         | 21    | 0.061 |
|                 | Cox <i>et al.</i> rat J  | .936         | 21    | 0.180 |
|                 | Guinea pig J             | .858         | 21    | 0.006 |
| Squirrel J      | .920                     | 21           | 0.086 |       |

230

231 **2. Supplementary results**

232 **(a) Stress distribution supplementary figures**

233 **Figure S3.** Cranial stress distribution during incisor biting for *Kryptobaatar* (A-C) and  
234 the mouse (D-F). Grey areas indicate von Mises stresses >10 MPa. Arrows indicate  
235 the biting tooth. Top row in left lateral view, middle row in dorsal view, bottom row in  
236 ventral view. Scales in B and E apply to A-C and D-F, respectively.

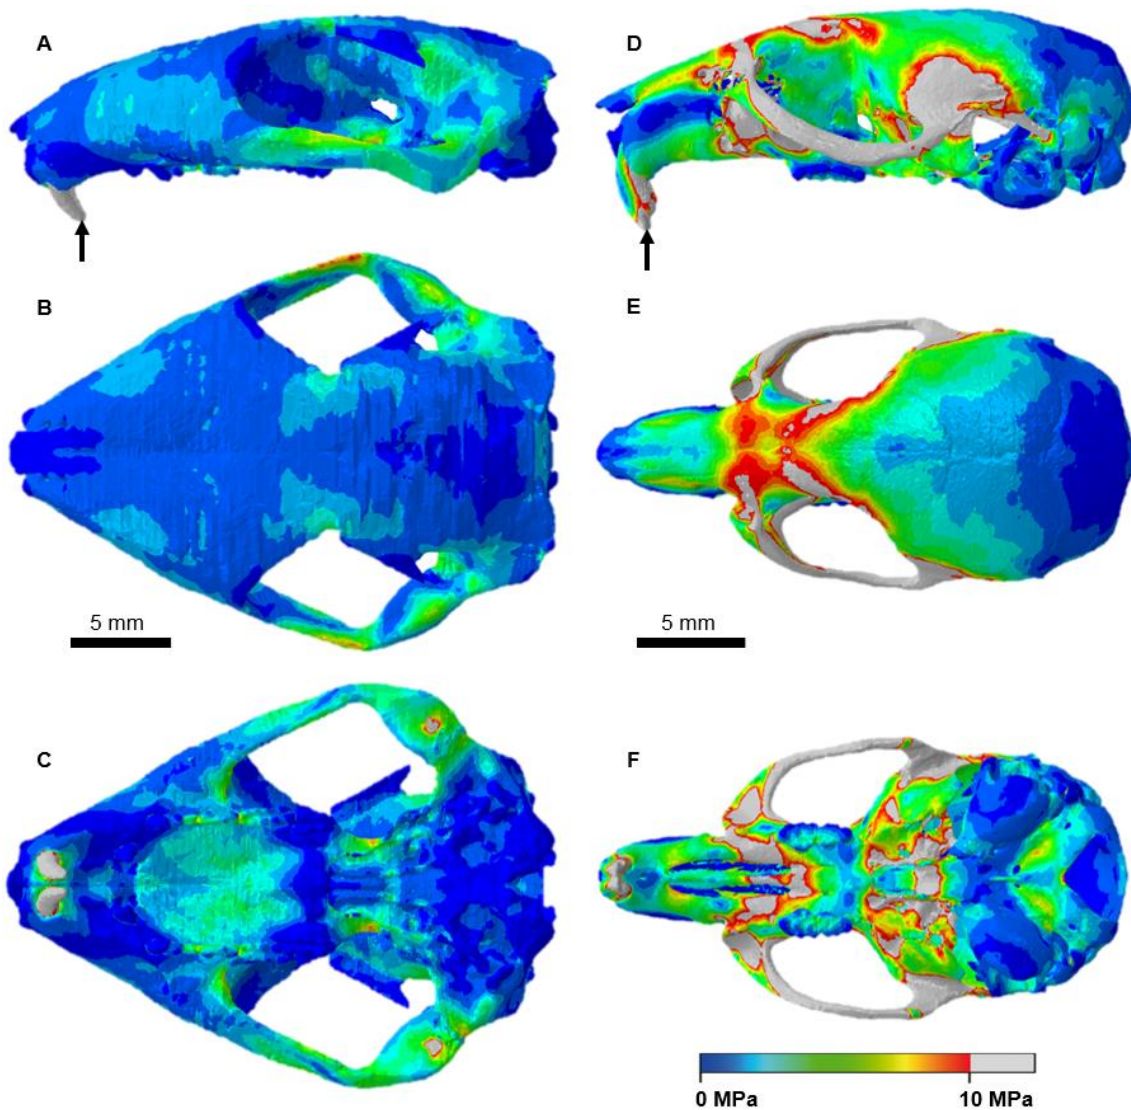

237

238 **Figure S4.** Cranial stress distribution during rear molar biting for *Kryptobaatar* (A-C)  
239 and the mouse (D-F). Grey areas indicate von Mises stresses >10 MPa. Arrows  
240 indicate the biting tooth. Top row in left lateral view, middle row in dorsal view,  
241 bottom row in ventral view. Scales in B and E apply to A-C and D-F, respectively.

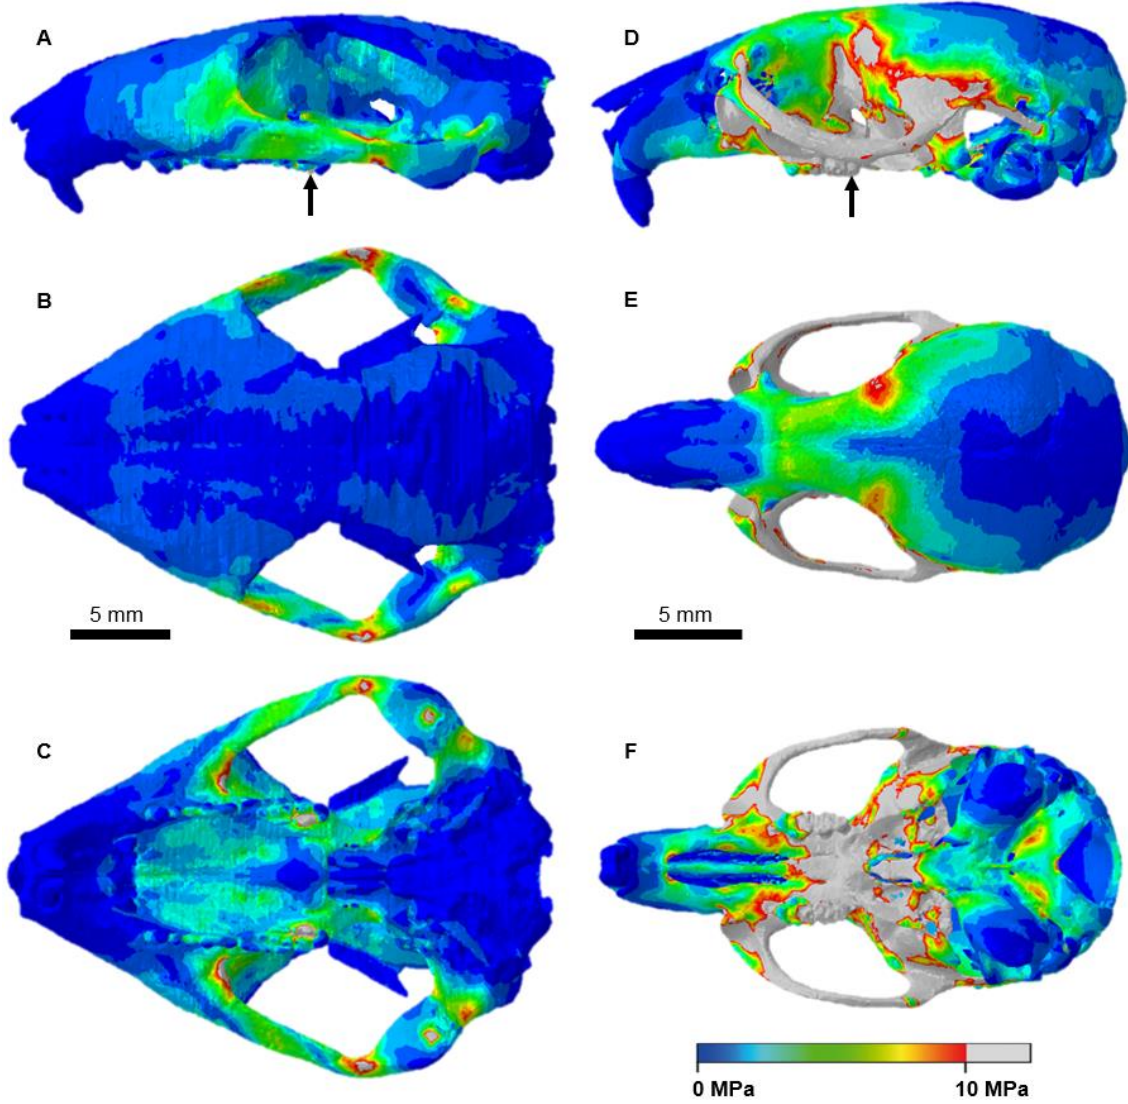

242

243 **Figure S5.** Stress distribution across the *Kryptobaatar* cranium during I3 (A-C) and  
244 P1 (D-F) biting. Top row in left lateral view, middle row in dorsal view, bottom row in  
245 ventral view.

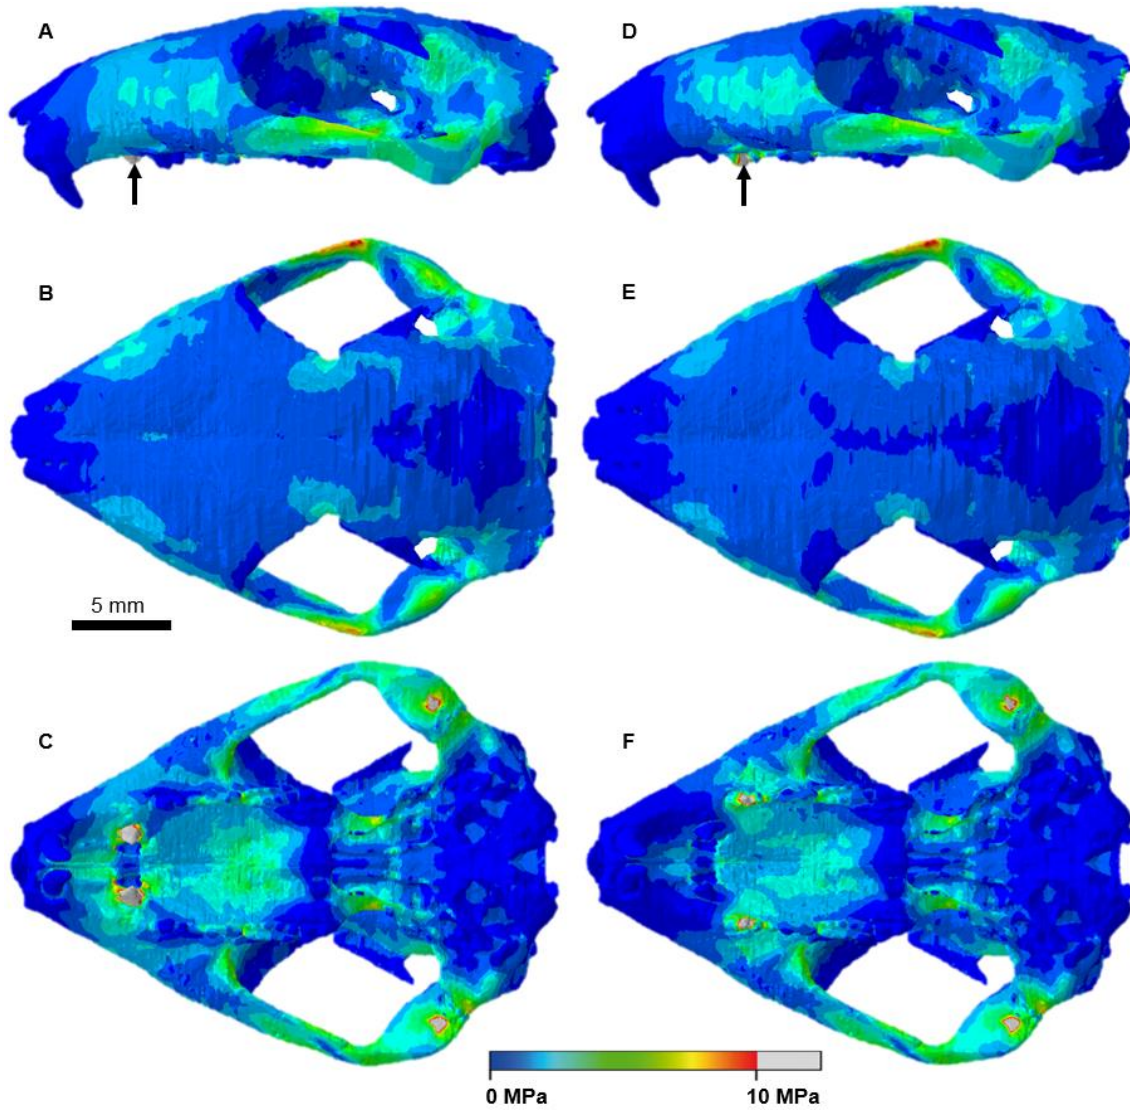

246



247 **Figure S6.** Stress distribution across the *Kryptobaatar* cranium during P2 (A-C) and  
248 P3 (D-F) biting. Top row in left lateral view, middle row in dorsal view, bottom row in  
249 ventral view.

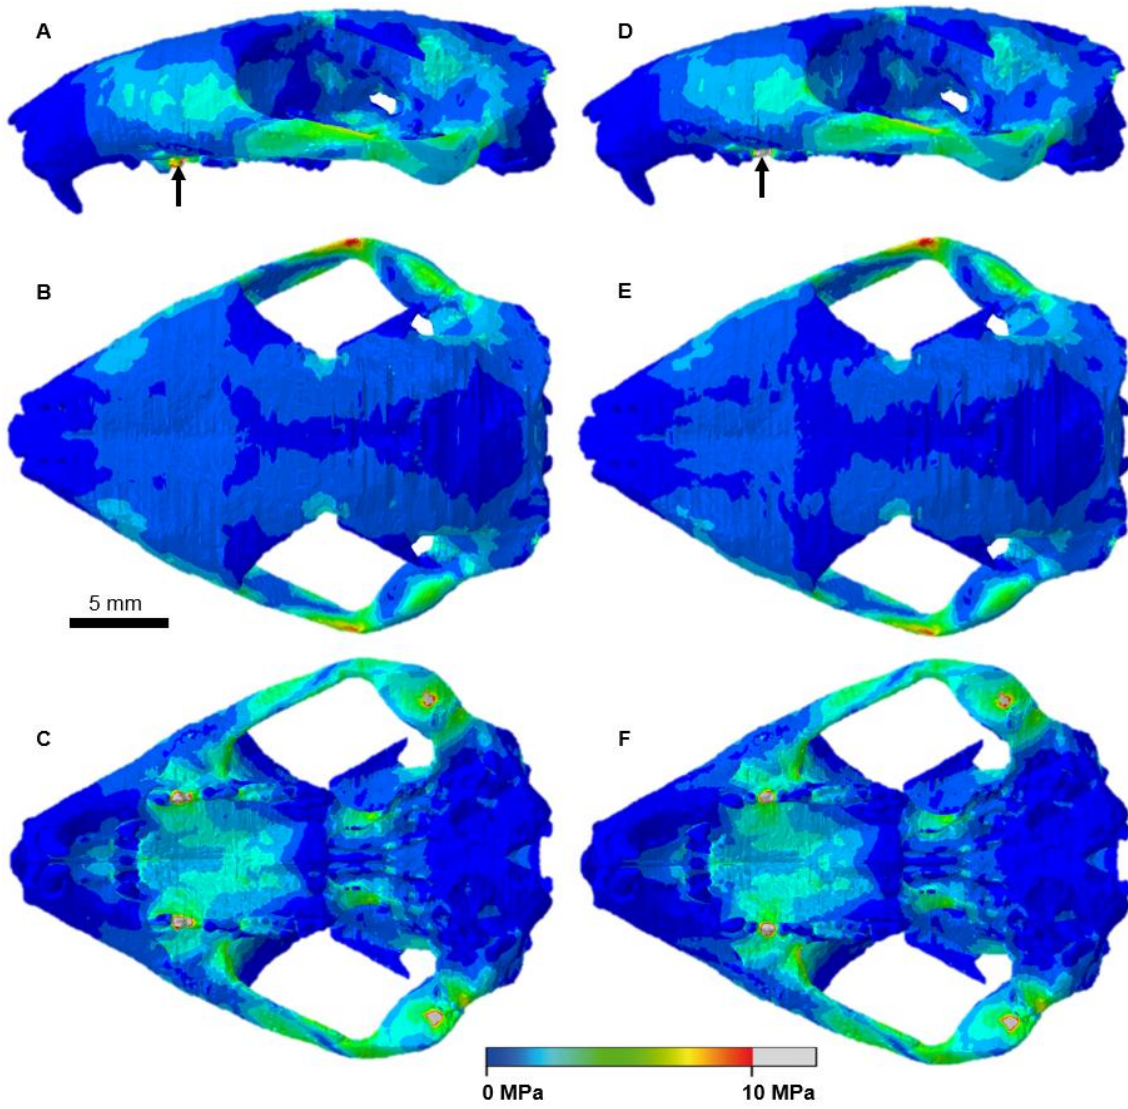

250

251 **Figure S7.** Stress distribution across the *Kryptobaatar* cranium during P4 (A-C) and  
252 M1 (D-F) biting. Top row in left lateral view, middle row in dorsal view, bottom row in  
253 ventral view.

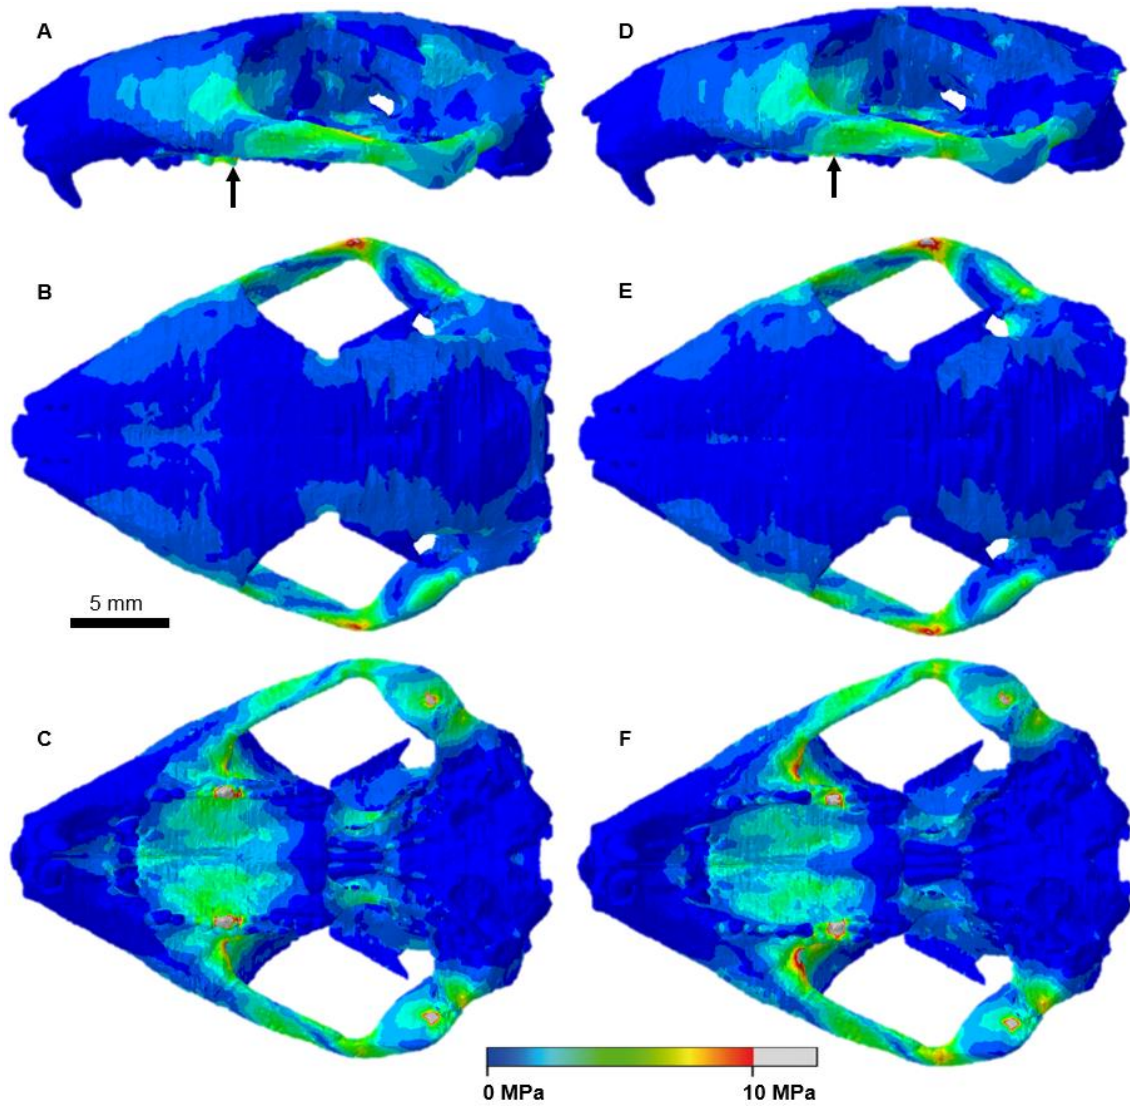

254

255 **Figure S8.** Stress distribution across the *Mus* cranium during M1 (A-C) and M2 (D-F)  
256 biting. Top row in left lateral view, middle row in dorsal view, bottom row in ventral  
257 view.

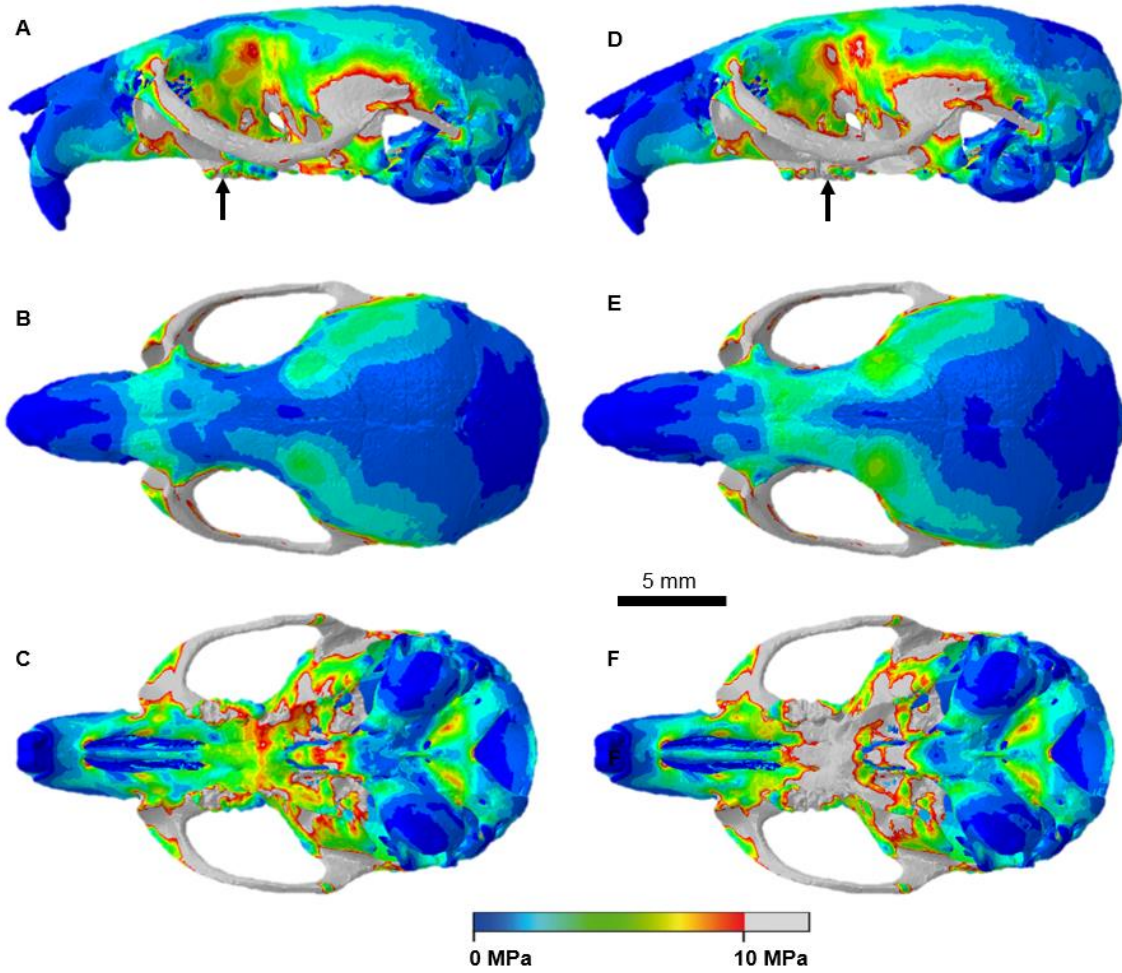

258

259 **Figure S9.** Hemimandibular stress distribution during incisor biting for *Kryptobaatar*  
260 (A-B), the mouse (C-D), rat (E-F), squirrel (G-H) and guinea pig (I-J). Grey areas  
261 indicate von Mises stresses >10 MPa. Arrows indicate the biting tooth. Images on  
262 the left side are in labial view, those on the right side are in lingual view. Scales on  
263 the left also apply to images on the right.

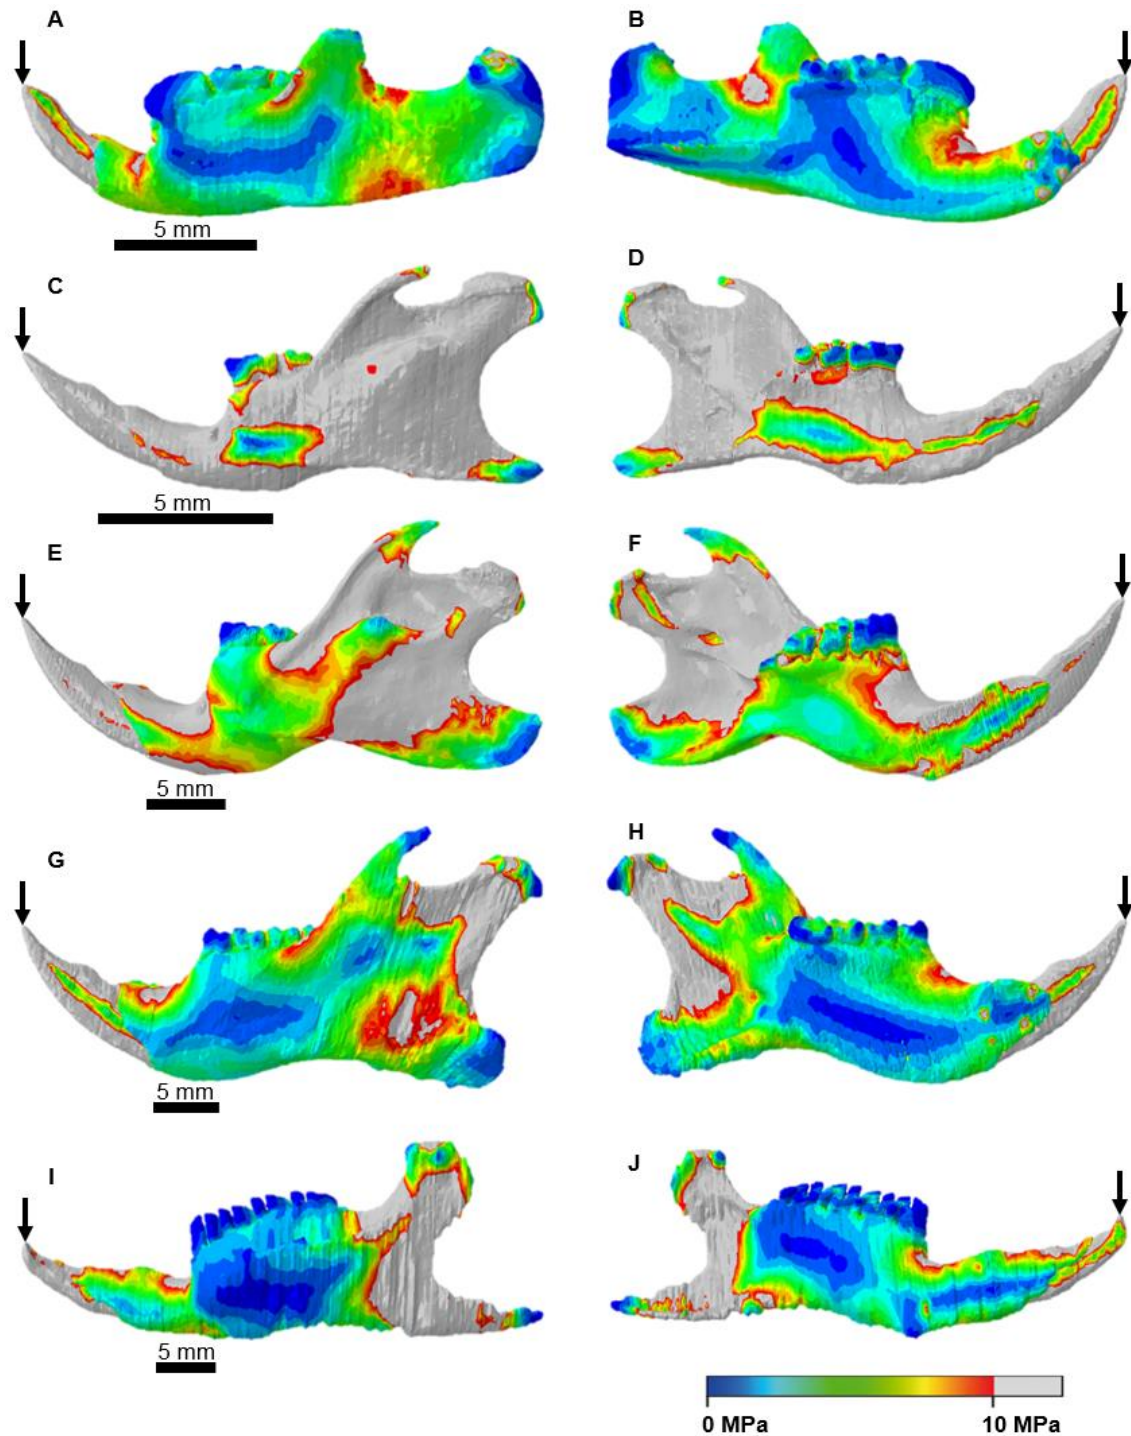

264

265 **Figure S10.** Stress distribution across the *Kryptobaatar* hemimandible during p4 (A-  
 266 B) and m1 (C-D) biting, and across the mouse (E-H) and rat (I-L) hemimandibles  
 267 during m1 (E-F, I-J) and m2 (G-H, K-L) biting. Images on the left side are in labial  
 268 view, those on the right side are in lingual view.

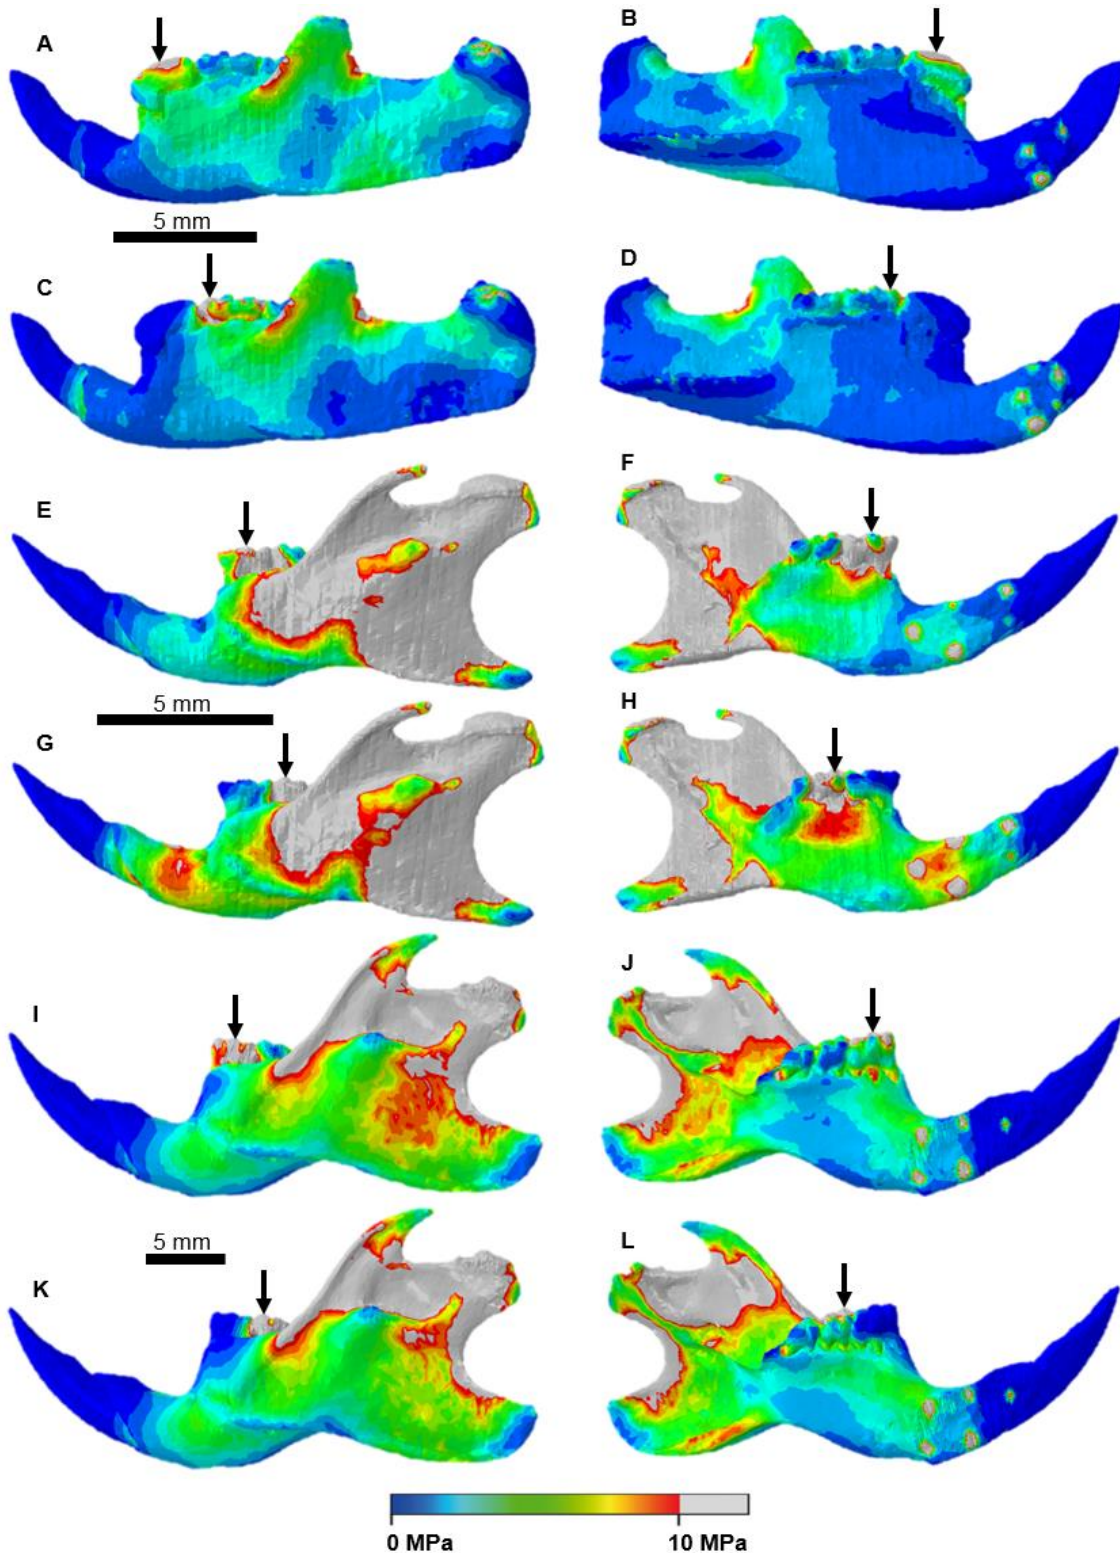

269

270 **Figure S11.** Stress distribution across the squirrel (A-F) and guinea pig (G-L)  
271 hemimandibles during p4 (A-B, G-H), m1 (C-D, I-J) and m2 (E-F, K-L) biting. Images  
272 on the left side are in labial view, those on the right side are in lingual view.

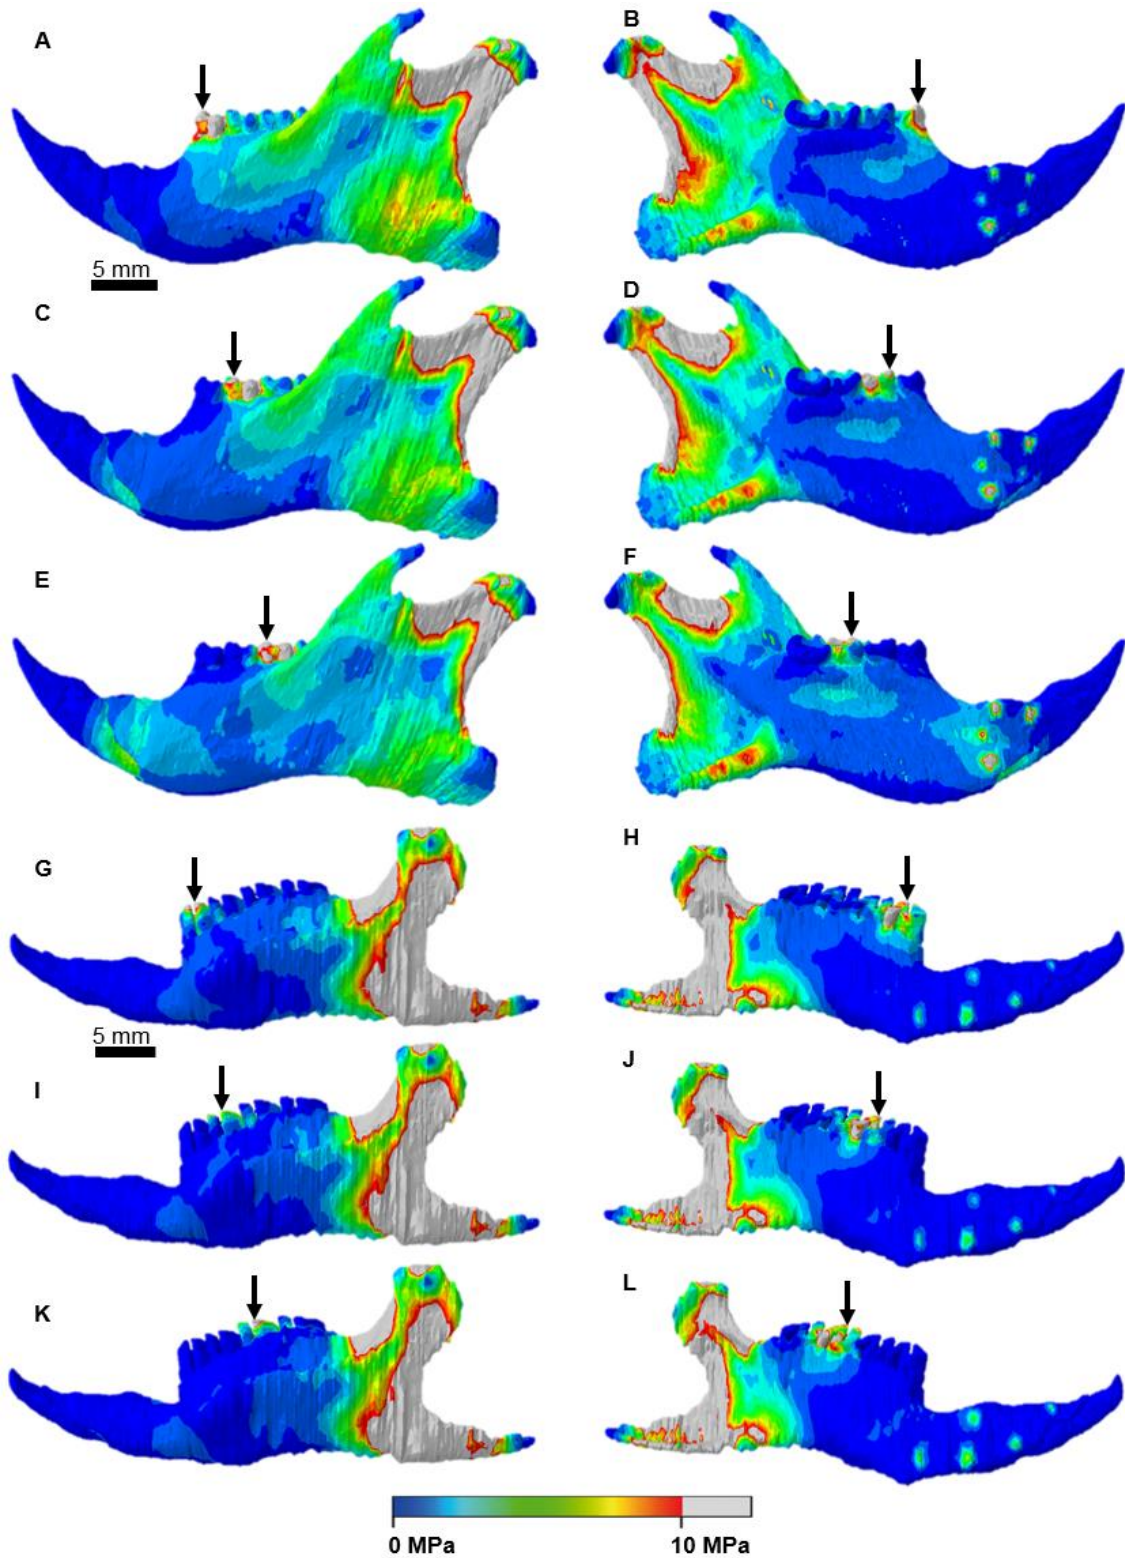

273

274

275 **(b) Cox *et al.* (2012) cranial stress distribution figures**

276

277 **Figure S12.** Predicted stress distribution of von Mises stresses across the crania of  
278 the squirrel, guinea pig and rat, reproduced from Cox *et al.* [1] (their figure 3). Arrows  
279 indicate the biting tooth, showing incisor bites (A-C), M1 bites (D-F) and M3 bites (G-  
280 I). Grey areas indicate von Mises stresses >10 MPa.

281

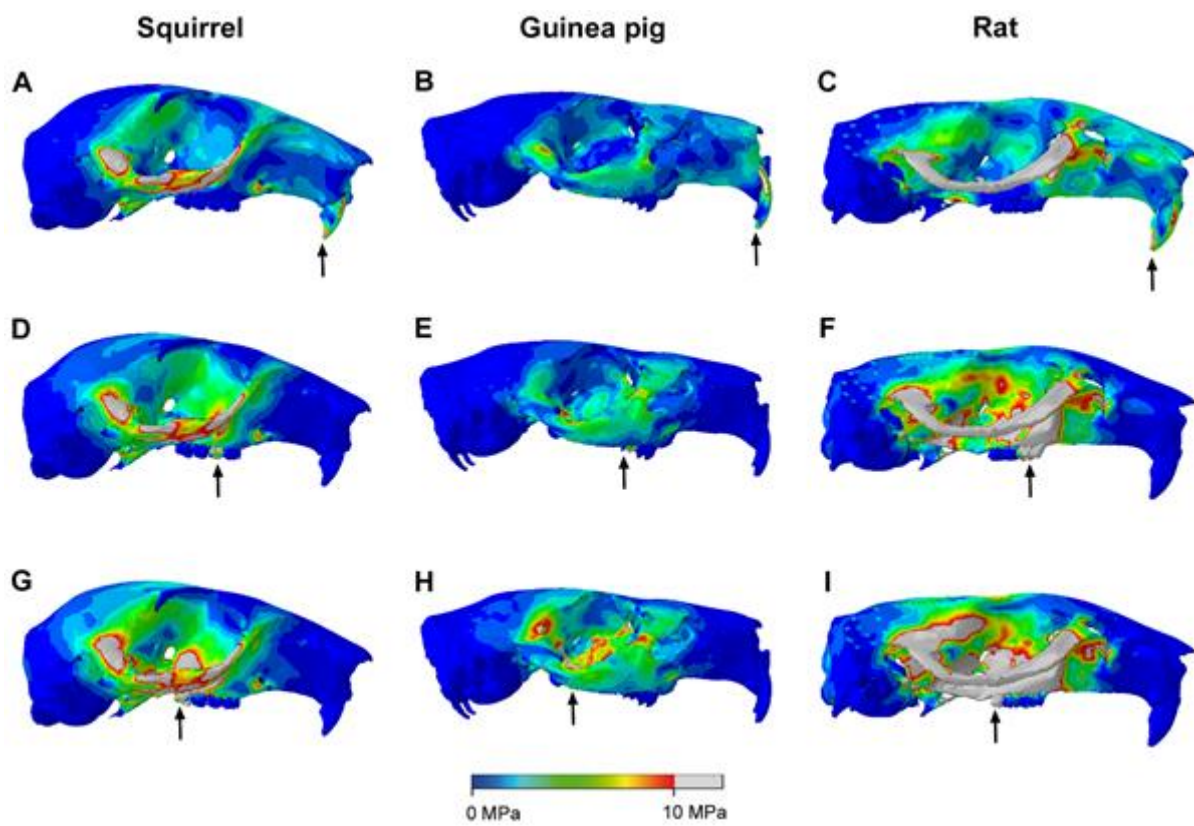

282

283 **(c) Average stress data**

284 **Table S21.** Raw median von Mises stress values (MPa) extracted from  
 285 hemimandibular FE model outputs.

|                            | <b>i1</b> | <b>p4</b> | <b>m1</b> | <b>m2</b> | <b>m3</b> |
|----------------------------|-----------|-----------|-----------|-----------|-----------|
| <b><i>Kryptobaatar</i></b> | 2.995     | 1.403     | 1.228     | 1.609     | -         |
| <b>Mouse</b>               | 15.644    | -         | 5.897     | 6.077     | 7.187     |
| <b>Rat</b>                 | 8.689     | -         | 3.128     | 2.774     | 3.588     |
| <b>Guinea pig</b>          | 2.533     | 1.019     | 0.805     | 0.735     | 0.713     |
| <b>Squirrel</b>            | 4.073     | 1.743     | 1.558     | 1.608     | 2.205     |

286

287 **Table S22.** Raw median von Mises stress values (MPa) extracted from the cranial  
 288 FE model output for *Kryptobaatar*.

|                            | <b>I2</b> | <b>I3</b> | <b>P1</b> | <b>P2</b> | <b>P3</b> | <b>P4</b> | <b>M1</b> | <b>M2</b> |
|----------------------------|-----------|-----------|-----------|-----------|-----------|-----------|-----------|-----------|
| <b><i>Kryptobaatar</i></b> | 1.124     | 1.051     | 0.889     | 0.860     | 0.800     | 0.716     | 0.631     | 0.829     |

289

290 **Table S23.** Raw median von Mises stress values (MPa) extracted from the cranial  
 291 FE model output for the mouse.

|              | <b>Incisor</b> | <b>M1</b> | <b>M2</b> | <b>M3</b> |
|--------------|----------------|-----------|-----------|-----------|
| <b>Mouse</b> | 5.027          | 4.312     | 4.865     | 4.956     |

292



293 **Table S24.** Calculations of percentage difference in median von Mises stress (MPa) between *Kryptobaatar* and rodent taxa for  
 294 mandibular and cranial models. Cranial data for the rat, guinea pig and squirrel from Cox *et al.* [1]. +/- columns indicate  
 295 directionality of differences.

| <b>Mandible</b> | <b><i>Kryptobaatar</i></b> | <b>Mouse</b> | <b>% diff</b>  | <b>+/-</b> | <b>Rat</b> | <b>% diff</b> | <b>+/-</b> | <b>Guinea pig</b> | <b>% diff</b> | <b>+/-</b> | <b>Squirrel</b> | <b>% diff</b> | <b>+/-</b> |
|-----------------|----------------------------|--------------|----------------|------------|------------|---------------|------------|-------------------|---------------|------------|-----------------|---------------|------------|
| i1              | 2.995                      | 15.644       | 135.725        | +          | 8.689      | 97.463        | +          | 2.533             | 16.724        | -          | 4.073           | 30.503        | +          |
| p4              | 1.403                      | n/a          |                |            | n/a        |               |            | 1.019             | 31.682        |            | 1.743           | 21.579        | +          |
| m1              | 1.228                      | 5.897        | 131.056        | +          | 3.128      | 87.230        | +          | 0.805             | 41.581        | -          | 1.558           | 23.674        | +          |
| m2              | 1.609                      | 6.077        | 116.251        | +          | 2.774      | 53.130        | +          | 0.735             | 74.610        | -          | 1.608           | 0.104         | -          |
| m3              | n/a                        | 7.187        |                |            | 3.588      |               |            | 0.713             |               |            | 2.205           |               |            |
| <b>avg.</b>     |                            |              | <b>127.678</b> | <b>+</b>   |            | <b>79.274</b> | <b>+</b>   |                   | <b>41.149</b> | <b>-</b>   |                 | <b>18.913</b> | <b>+</b>   |
| <b>Cranium</b>  |                            |              |                |            |            |               |            |                   |               |            |                 |               |            |
| <b>Cranium</b>  | <b><i>Kryptobaatar</i></b> | <b>Mouse</b> | <b>% diff</b>  | <b>+/-</b> | <b>Rat</b> | <b>% diff</b> | <b>+/-</b> | <b>Guinea pig</b> | <b>% diff</b> | <b>+/-</b> | <b>Squirrel</b> | <b>% diff</b> | <b>+/-</b> |
| Upper incisor   | 1.124                      | 5.027        | 126.890        | +          | 1.600      | 34.913        | +          | 0.700             | 46.526        | -          | 1.100           | 2.195         | -          |
| I3              | 1.051                      | n/a          |                |            | n/a        |               |            | n/a               |               |            | n/a             |               |            |
| P1              | 0.889                      | n/a          |                |            | n/a        |               |            | n/a               |               |            | n/a             |               |            |
| P2              | 0.860                      | n/a          |                |            | n/a        |               |            | n/a               |               |            | n/a             |               |            |
| P3              | 0.800                      | n/a          |                |            | n/a        |               |            | n/a               |               |            | n/a             |               |            |
| P4              | 0.716                      | n/a          |                |            | n/a        |               |            | 0.500             |               |            | 0.700           |               |            |
| M1              | 0.631                      | 4.312        | 148.968        | +          | 1.100      | 54.243        | +          | 0.550             | 13.658        | -          | 0.700           | 10.427        | +          |
| M2              | 0.829                      | 4.865        | 141.761        | +          | 1.300      | 44.239        | +          | 0.600             | 32.058        | -          | 0.800           | 3.568         | -          |
| M3              | n/a                        | 4.956        |                |            | 1.500      |               |            | 0.700             |               |            | 0.900           |               |            |
| <b>avg.</b>     |                            |              | <b>139.207</b> |            |            | <b>44.465</b> |            |                   | <b>30.747</b> |            |                 | <b>1.555</b>  |            |

296

297 **(d) Mechanical efficiency data**

298 **Table S25.** Mechanical efficiency raw data for the hemimandibles.

| <b>Taxon</b>        | <b>Tooth</b> | <b>Reaction force at biting tooth (N)</b> | <b>Total input force (N)</b> | <b>Mechanical efficiency</b> |
|---------------------|--------------|-------------------------------------------|------------------------------|------------------------------|
| <i>Kryptobaatar</i> | i1           | 2.506                                     | 13.06                        | 0.192                        |
|                     | p4           | 3.917                                     |                              | 0.300                        |
|                     | m1           | 5.469                                     |                              | 0.419                        |
|                     | m2           | 8.594                                     |                              | 0.658                        |
| Mouse               | i1           | 5.051                                     | 20.94                        | 0.241                        |
|                     | m1           | 13.612                                    |                              | 0.650                        |
|                     | m2           | 14.241                                    |                              | 0.680                        |
|                     | m3           | 16.709                                    |                              | 0.798                        |
| Rat                 | i1           | 11.838                                    | 46.94                        | 0.252                        |
|                     | m1           | 29.434                                    |                              | 0.627                        |
|                     | m2           | 33.617                                    |                              | 0.716                        |
|                     | m3           | 44.484                                    |                              | 0.948                        |
| Guinea pig          | i1           | 10.083                                    | 44.13                        | 0.228                        |
|                     | p4           | 24.422                                    |                              | 0.553                        |
|                     | m1           | 25.352                                    |                              | 0.574                        |
|                     | m2           | 30.202                                    |                              | 0.684                        |
|                     | m3           | 37.799                                    |                              | 0.857                        |
| Squirrel            | i1           | 15.190                                    | 55.20                        | 0.275                        |
|                     | p4           | 26.459                                    |                              | 0.479                        |
|                     | m1           | 30.301                                    |                              | 0.549                        |
|                     | m2           | 35.683                                    |                              | 0.646                        |
|                     | m3           | 47.550                                    |                              | 0.861                        |

299

300

301 **Table S26.** Mechanical efficiency raw data for the crania.

| <b>Taxon</b>        | <b>Tooth</b> | <b>Reaction force at biting tooth (N)</b> | <b>Total input force (N)</b> | <b>Mechanical efficiency</b> |
|---------------------|--------------|-------------------------------------------|------------------------------|------------------------------|
| <i>Kryptobaatar</i> | I2           | 4.445                                     | 26.12                        | 0.170                        |
|                     | I3           | 5.289                                     |                              | 0.202                        |
|                     | P1           | 6.054                                     |                              | 0.232                        |
|                     | P2           | 6.372                                     |                              | 0.244                        |
|                     | P3           | 6.724                                     |                              | 0.257                        |
|                     | P4           | 7.685                                     |                              | 0.294                        |
|                     | M1           | 9.378                                     |                              | 0.359                        |
|                     | M2           | 12.752                                    |                              | 0.488                        |
| Mouse               | Incisor      | 8.617                                     | 41.88                        | 0.206                        |
|                     | M1           | 18.845                                    |                              | 0.450                        |
|                     | M2           | 22.910                                    |                              | 0.547                        |
|                     | M3           | 27.532                                    |                              | 0.657                        |

302

303 **(e)  $Z_x$ ,  $Z_y$ ,  $J$  supplementary data**

304 **Table S27.** Wilcoxon test results for the pairwise comparisons of bending and  
 305 torsional resistance along the rostrum and mandible between *Kryptobaatar* and  
 306 rodent taxa, showing the Wilcoxon test statistic ( $Z$ ) and associated  $p$ -value.  $Z_x$  is the  
 307 dorsoventral section modulus (resistance to dorsoventral bending),  $Z_y$  is the  
 308 mediolateral section modulus (resistance to mediolateral bending),  $J$  is the polar  
 309 moment of inertia (resistance to torsion). Those highlighted in grey are significantly  
 310 different. Results that shift to non-significance after applying the Bonferroni  
 311 correction are marked with an asterisk (\*). +/- column indicates whether rodent  
 312 values are significantly higher (+) or lower (-) than *Kryptobaatar*.

|                     | Taxon 1             | Taxon 2                    | Z      | p-value | +/- |
|---------------------|---------------------|----------------------------|--------|---------|-----|
| Mandible            | $Z_x$               |                            |        |         |     |
|                     | <i>Kryptobaatar</i> | <i>Mus</i>                 | -1.408 | 0.159   |     |
|                     | <i>Kryptobaatar</i> | <i>Rattus</i>              | -0.956 | 0.339   |     |
|                     | <i>Kryptobaatar</i> | <i>Cavia</i>               | -0.191 | 0.848   |     |
|                     | <i>Kryptobaatar</i> | <i>Sciurus</i>             | -2.068 | 0.039*  | +   |
|                     | $Z_y$               |                            |        |         |     |
|                     | <i>Kryptobaatar</i> | <i>Mus</i>                 | -1.721 | 0.085   |     |
|                     | <i>Kryptobaatar</i> | <i>Rattus</i>              | -2.746 | 0.006   | -   |
|                     | <i>Kryptobaatar</i> | <i>Cavia</i>               | -0.087 | 0.931   |     |
|                     | <i>Kryptobaatar</i> | <i>Sciurus</i>             | -0.504 | 0.614   |     |
|                     | $J$                 |                            |        |         |     |
|                     | <i>Kryptobaatar</i> | <i>Mus</i>                 | -1.095 | 0.274   |     |
|                     | <i>Kryptobaatar</i> | <i>Rattus</i>              | -0.643 | 0.520   |     |
|                     | <i>Kryptobaatar</i> | <i>Cavia</i>               | -0.295 | 0.768   |     |
|                     | <i>Kryptobaatar</i> | <i>Sciurus</i>             | -1.721 | 0.085   |     |
|                     | Rostrum             | $Z_x$                      |        |         |     |
| <i>Kryptobaatar</i> |                     | <i>Mus</i>                 | -3.771 | <0.001  | -   |
| <i>Kryptobaatar</i> |                     | <i>Rattus</i> (DigiMorph)  | -3.458 | 0.001   | -   |
| <i>Kryptobaatar</i> |                     | <i>Rattus</i> (Cox et al.) | -3.285 | 0.001   | -   |
| <i>Kryptobaatar</i> |                     | <i>Cavia</i>               | -3.424 | 0.001   | +   |
| <i>Kryptobaatar</i> |                     | <i>Sciurus</i>             | -3.875 | <0.001  | +   |
| $Z_y$               |                     |                            |        |         |     |
| <i>Kryptobaatar</i> |                     | <i>Mus</i>                 | -3.841 | <0.001  | -   |
| <i>Kryptobaatar</i> |                     | <i>Rattus</i> (DigiMorph)  | -3.806 | <0.001  | -   |
| <i>Kryptobaatar</i> |                     | <i>Rattus</i> (Cox et al.) | -3.875 | <0.001  | -   |
| <i>Kryptobaatar</i> |                     | <i>Cavia</i>               | -0.087 | 0.931   |     |
| <i>Kryptobaatar</i> |                     | <i>Sciurus</i>             | -2.728 | 0.006   | +   |
| $J$                 |                     |                            |        |         |     |
| <i>Kryptobaatar</i> |                     | <i>Mus</i>                 | -3.806 | <0.001  | -   |
| <i>Kryptobaatar</i> |                     | <i>Rattus</i> (DigiMorph)  | -3.702 | <0.001  | -   |
| <i>Kryptobaatar</i> |                     | <i>Rattus</i> (Cox et al.) | -3.702 | <0.001  | -   |
| <i>Kryptobaatar</i> | <i>Cavia</i>        | -2.172                     | 0.030* | +       |     |
| <i>Kryptobaatar</i> | <i>Sciurus</i>      | -3.980                     | <0.001 | +       |     |

313

314 **References**

- 315 1. Cox P.G., Rayfield E.J., Fagan M.J., Herrel A., Pataky T.C., Jeffery N. 2012  
316 Functional evolution of the feeding system in rodents. *PLoS ONE* **7**, e36299.
- 317 2. Thomason J.J. 1991 Cranial strength in relation to estimated biting forces in some  
318 mammals. *Can J Zool* **69**, 2326-2333.
- 319 3. Baverstock H., Jeffery N.S., Cobb S.N. 2013 The morphology of the mouse  
320 masticatory musculature. *J Anat* **223**, 46-60.
- 321 4. Gambaryan P.P., Kielan-Jaworowska Z. 1995 Masticatory musculature of Asian  
322 taeniolabidoid multituberculate mammals. *Acta Palaeontol Pol* **40**, 45-108.
- 323 5. Cox P.G., Jeffery N. 2011 Reviewing the morphology of the jaw-closing musculature  
324 in squirrels, rats, and guinea pigs with contrast-enhanced microCT. *Anat Rec* **294**, 915-928.
- 325 6. Bright J.A., Rayfield E.J. 2011 The response of cranial biomechanical finite element  
326 models to variations in mesh density. *Anat Rec* **294**, 610-620. (doi:10.1002/ar.21358).
- 327 7. Cox P.G., Fagan M.J., Rayfield E.J., Jeffery N. 2011 Finite element modelling of  
328 squirrel, guinea pig and rat skulls: using geometric morphometrics to assess sensitivity. *J*  
329 *Anat* **219**, 696-709.
- 330 8. Wall C.E., Krause D.W. 1992 A biomechanical analysis of the masticatory apparatus  
331 of *Ptilodus* (Multituberculata). *J Vert Paleontol* **12**, 172-187.
- 332 9. Weijs W.A., Dantuma R. 1975 Electromyography and mechanics of mastication in  
333 the albino rat. *J Morphol* **146**, 1-33.
- 334 10. Jeffery N.S., Stephenson R.S., Gallagher J.A., Jarvis J.C., Cox P.G. 2011 Micro-  
335 computed tomography with iodine staining resolves the arrangement of muscle fibres. *J*  
336 *Biomech* **44**, 189-192. (doi:10.1016/j.jbiomech.2010.08.027).
- 337 11. Wroe S., McHenry C., Thomason J. 2005 Bite club: comparative bite force in big  
338 biting mammals and the prediction of predatory behaviour in fossil taxa. *Proc R Soc B* **272**,  
339 619-625.

340 12. Kielan-Jaworowska Z., Lancaster T.E. 2004 A new reconstruction of multituberculate  
341 endocranial casts and encephalization quotient of *Kryptobaatar*. *Acta Palaeontol Pol* **49**,  
342 177-188.  
343
